# Supplementary material
Source: Research Square preprint supplement (doi:10.21203/rs.3.rs-9941842/v1)
Supplement: Supplementary file 1 [file 96219eedc5dd8d20c15062c7.pdf]

1 **Supplementary information**

2 **Oxygen species-driven dynamic reconstruction with wide-**  
3 **range valence oscillation boosts CO<sub>2</sub> electroreduction**

4 Hanxia Chen <sup>1</sup>†, Juzhe Liu <sup>1\*</sup>†, Peiyuan Du <sup>1</sup>, Jinmeng Li <sup>1</sup>, Zhouqing Xue <sup>1</sup>, Yuheng  
5 Wang <sup>1</sup>, Xiaoxue Xu <sup>1</sup>, Jing Zhang <sup>2</sup>, Zhongfei Xu <sup>1\*</sup>, Qiangwei Li <sup>1</sup>, Guang Mo <sup>2</sup>,  
6 Yunpeng Liu <sup>2,3\*</sup> and Lidong Wang <sup>1\*</sup>

7 <sup>1</sup>MOE Key Laboratory of Resources and Environmental Systems Optimization,  
8 College of Environmental Science and Engineering, North China Electric Power  
9 University, Beijing, 102206, P. R. China

10 <sup>2</sup>Institute of High Energy Physics, Chinese Academy of Sciences, Beijing 100049, P. R.  
11 China

12 <sup>3</sup>University of Chinese Academy of Sciences, Chinese Academy of Sciences, Beijing  
13 100049, China

14 †These authors contribute equally to this work.

15 \*E-mail: liujuzhe@ncepu.edu.cn; xuzhongfei@ncepu.edu.cn; liuyunpeng@ihep.ac.cn;  
16 wld@ncepu.edu.cn

17 This file contains Figures S1-S61 and Tables S1-S4.

1  
2  
3  
4  
5  
6

## Table of Content

|                                 |    |
|---------------------------------|----|
| Supplementary Experimental..... | 3  |
| Supplementary Figures.....      | 10 |
| Supplementary Tables .....      | 71 |
| Supplementary References.....   | 76 |

# 1 **Supplementary Experimental**

## 2 **Materials and chemicals**

3 Copper (II) chloride dihydrate ( $\text{CuCl}_2 \cdot 2\text{H}_2\text{O}$ ,  $\geq 99.9\%$ ), Ascorbic acid (AA,  
4  $\geq 99.0\%$ ) and Sodium citrate were purchased from Shanghai Aladdin Biochemical  
5 Technology Co., Ltd. Potassium hydroxide (KOH,  $\geq 95.0\%$ ) was purchased from  
6 Shanghai Macklin Biochemical Co., Ltd. Polyvinylpyrrolidone (PVP, MW 30000) was  
7 obtained from Xilong Scientific Co., Ltd. Nafion solution (5 wt%) was provided by  
8 Dupont Company. Ethanol ( $\text{C}_2\text{H}_5\text{OH}$ ,  $\geq 99.7\%$ ) was supplied by Tianjin Fuchen  
9 Chemical Reagent Co., Ltd. Deuterium oxide (DMSO,  $\geq 99.9\%$ ) was purchased from  
10 Innochem. Ni foam and gas diffusion layer (GDL, YLS-30T) were purchased from  
11 Suzhou Sinero.  $\text{CO}_2$  ( $\geq 99.999\%$ ),  $\text{CO}$  ( $\geq 99.999\%$ ) and Ar ( $\geq 99.9999\%$ ) were all  
12 supplied by Air. Deionized water (18.25  $\text{M}\Omega \text{ cm}$ ) was used in all experiments. All the  
13 chemical reagents were used as received without any further purification.

## 14 **Synthesis of truncated $\text{Cu}_2\text{O}$ (t- $\text{Cu}_2\text{O}$ )**

15 For typical synthesis of t- $\text{Cu}_2\text{O}$ <sup>1</sup>, 1.5 g of PVP was treated by 100 mL of 0.01 M  
16  $\text{CuCl}_2 \cdot 2\text{H}_2\text{O}$  solution, followed by addition of 10 mL of 2.0 M NaOH into the mixture.  
17 After continuous stirring for 0.5 h, 10.0 mL of 0.6 M AA solution was added dropwise  
18 to the resulting blue solution. The mixture was then agitated in a water bath at 55 °C  
19 for 3 h, during which the solution underwent a gradual color transition to orange-yellow.  
20 Thereafter, the precipitate was centrifuged, washed three times with deionized water  
21 and absolute ethanol for three times respectively, and dried in a vacuum at 60 °C for 12  
22 h.

## 23 **Synthesis of cubic $\text{Cu}_2\text{O}$ (c- $\text{Cu}_2\text{O}$ )**

24 c- $\text{Cu}_2\text{O}$  was obtained via identical experimental procedures without introducing  
25 PVP into  $\text{CuCl}_2 \cdot 2\text{H}_2\text{O}$  aqueous solution.

## 26 **Synthesis of 3D orthogonal cross-shaped $\text{Cu}_2\text{O}$ (oc- $\text{Cu}_2\text{O}$ )**

27 Typically, oc- $\text{Cu}_2\text{O}$  particles were fabricated as follows<sup>2</sup>. Initially, a homogeneous  
28 mixture was prepared by combining 2.5 mL of 2 M NaOH and 2.5 mL of 0.6 M AA

1 aqueous solutions, followed by dilution with 25 mL deionized water. Subsequently,  
2 the mixture was stirred for 3 h in a water bath at 55 °C, during which the solution  
3 underwent a gradual color transition to dark-brown. Following cooling to room  
4 temperature, 36 mg of pre-synthesized t-Cu<sub>2</sub>O samples were dispersed into the mixture  
5 under ultrasonication. Thereafter, 0.9 g of sodium citrate was introduced to the mixture.  
6 After continuous stirring for 24 h, the resultant precipitate was collected by  
7 centrifugation and washed three times with deionized water. Finally, the sample was  
8 dried under vacuum at 60 °C for 12 h.

### 9 **Materials Characterizations**

10 X-Ray Diffractometer (XRD, Smart Lab SE) with Cu K $\alpha$  radiation ( $\lambda=1.5406$  Å)  
11 was employed to collect the phase and structure of the materials. The X-ray  
12 photoelectron spectrometer (XPS, ESCALAB 250xi) was utilized to identify the  
13 composition of the materials. The highest peak in C 1 s spectra was shifted to 284.8 eV  
14 for charge correction. The images of the morphology of materials were collected at  
15 scanning electron microscopy (SEM, Zeiss Gemini 300 SEM). Transmission electronic  
16 microscope (TEM) and high-resolution TEM (HRTEM) images were collected using a  
17 Talos F200X G2 microscope to characterize the microstructural features.

### 18 ***In-situ* characterization methods:**

#### 19 ***In-situ* X-ray Absorption Spectroscopy (XAS) measurements**

20 *In-situ* XAS spectra of Cu K-edge were collected at the 1W1B beamline of the  
21 Beijing Synchrotron Radiation Facility (BSRF) under electrochemical CO<sub>2</sub>RR  
22 conditions. A custom-built *in-situ* electrochemical cell was applied using the similar  
23 configuration as a flow-cell electrolytic reacto. The catalyst ink was dispersed on a  
24 piece of gas diffusion electrode. A platinum electrode and Ag/AgCl electrode were used  
25 as the counter and reference electrode, respectively. The experiments at the 1W1B  
26 beamline were conducted in a conventional stepwise scan mode (ca. 15 min per  
27 spectrum). The XAS data was processed using the Athena and Artemis programs. All  
28 acquired X-ray absorption spectra were subjected to edge-step normalization to derive

1 EXAFS spectra, followed by energy calibration. The  $k^3$ -weighted  $\chi(k)$  data of the Cu  
2 K-edge were transformed from k-space to R-space via Fourier transform (Figures S30-  
3 S33). Structural parameters in the vicinity of Cu atoms were fitted using the ARTEMIS  
4 module (Table S1).

#### 5 ***In-situ* time-resolved XAS measurements**

6 *In-situ* time-resolved XAS spectra of Cu K-edge were collected at the 1W2B  
7 beamline of the Beijing Synchrotron Radiation Facility (BSRF) under electrochemical  
8 CO<sub>2</sub>RR conditions. The material-coated ultrathin carbon paper was placed in a custom-  
9 built cell connected to a portable electrochemical workstation (CHI 1140D). All the  
10 XAS data were recorded via fluorescence modes with a Si(111) double crystal  
11 monochromator (DCM) cooled with liquid nitrogen, respectively. The experiments at  
12 the 1W2B beamline were conducted in the quick-scanning extended X-ray absorption  
13 fine-structure (QEXAFS) mode. Spectra were first collected for the material in the  
14 electrolyte solution, then after three cycles of linear sweep voltammetry (LSV), and  
15 finally under chronoamperometry (CA) conditions. To obtain high-quality spectra, the  
16 time resolution of the time-resolved XAS was set to 18 seconds.

#### 17 ***In-situ* wide-angle X-ray scattering (WAXS) measurements**

18 The WAXS patterns were recorded using DECTRIS EIGER2 4M at the ID08-Pink  
19 Small-angle Scattering Beamline of High Energy Photon Source (HEPS-ID08). The  
20 incident X-ray energy was fixed at 12 keV ( $\lambda=1.033$  Å). The data collection time for  
21 each image is 500 milliseconds. The distance from the sample to the detector was  
22 calibrated using the WAXS pattern of a LaB6 standard sample as 203 mm. In a typical  
23 measurement, the WAXS scan would go through the entire custom-built cell from the  
24 anode through an anion exchange membrane and all the way to the cathodic GDE. The  
25 2D WAXS patterns were further converted to 1D curves using the ScatterX3 software.

#### 26 ***In-situ* Raman measurements**

27 *In-situ* Raman measurements were acquired on a Jobin Yvon HR800 spectrometer  
28 equipped with a 633 nm laser, covering a spectral range of 200-2300 cm<sup>-1</sup>. Raman

1 spectra were acquired by averaging 3 scans (10 s per scan). The measurements were  
2 carried out in a custom-built flow cell with a similar configuration as the flow cell reacto.  
3 A platinum electrode and Ag/AgCl electrode were used as the counter and reference  
4 electrode, respectively. The catalyst was applied to gas diffusion electrodes using an  
5 air-spraying technique, and the tests were performed in a 1 M KOH solution with a  
6 continuous purge of high-purity CO<sub>2</sub> (99.999%).

### 7 ***In-situ* ATR-SEIRAS measurements**

8 *In-situ* ATR-SEIRAS measurements were performed using a Bruker Invenio-S FT-  
9 IR spectrometer equipped with an internal reflection accessory (SPEC-I, Shanghai  
10 Yuanfang Tech. Co., Ltd., China) in a typical reactor consisting of two chambers with  
11 three electrodes. A platinum electrode and Ag/AgCl electrode were used as the counter  
12 and reference electrode, respectively. A pretreated Si face-angle crystals at an incidence  
13 angle of 60° was used as the reflection element. Au films were deposited by chemical  
14 deposition on the Si crystals<sup>3</sup>. The catalyst ink was deposited onto the Au film and air-  
15 dried to form the catalytic layer before testing. The electrolyte for *in-situ* ATR-SEIRAS  
16 measurements was CO<sub>2</sub>-saturated KHCO<sub>3</sub> (0.1 M). All spectra were collected in  
17 absorbance mode with a resolution of 4 cm<sup>-1</sup>, by averaging 32 scans. Infrared spectra  
18 were collected during CO<sub>2</sub>RR while applying cathodic potentials ranging from -0.57 to  
19 -1.37 V *vs.* RHE. The electrochemical workstation (CHI 760E, Shanghai CH  
20 Instruments Co., China) was utilized for the potential control. Spectra recorded under  
21 open circuit potential (OCP) conditions were used for background subtraction. All  
22 spectra were converted to the absorbance unit as  $-\log(I/I_0)$ , where  $I$  and  $I_0$  represent the  
23 signal intensities of the reflected radiation of the sample and reference spectra.

### 24 **Electrochemical measurements**

#### 25 **Preparation of GDEs**

26 For the preparation of gas diffusion electrode (GDE), 20 mg of the catalyst powder  
27 was dispersed in a mixture of 4 mL ethanol and 80 μL 5 wt.% Nafion solution by  
28 ultrasound for 1 h. Then, the obtained ink was uniformly spray-coated onto a piece of

1 3 cm × 5 cm gas diffusion layer (GDL, YLS-30T) to prepare GDEs. Then, the above  
2 GDEs were heated at 60 °C for 0.5 h to remove residual ethanol, avoiding negative  
3 effects on CO<sub>2</sub>RR performance and product analysis. The electrode with a catalyst  
4 loading density of 0.5 mg cm<sup>-2</sup> was cut into 0.8 cm × 2.3 cm pieces for use.

5 **Electrocatalytic CO<sub>2</sub> reduction reaction (CO<sub>2</sub>RR) measurements**

6 CO<sub>2</sub>RR was conducted in a flow-cell (101017, Gaossunion, working electrode  
7 area with 0.5 cm × 2.0 cm) using electrochemical workstation (CHI 1140D). The flow-  
8 cell configuration consisted of a three-electrode system, and the as prepared GDEs,  
9 nickel foam and Ag/AgCl electrode were used as the working electrode, counter  
10 electrode and reference electrode, respectively. Electrolysis was performed in 3 M KOH,  
11 and catholyte and anolyte were separated by an anion exchange membrane (FAB-PK-  
12 130, Fuel Cell Store). The cathodic electrolyte (30 mL) was circulated through the  
13 electrolyte chambers under constant flow (5 mL min<sup>-1</sup>) via peristaltic pump. The anodic  
14 electrolyte was circulated through the anodic chamber by a gas-liquid mixed flow pump.  
15 The CO<sub>2</sub> was supplied into gas chambers with a constant rate of 10 mL min<sup>-1</sup> by a mass-  
16 flow controller, and the gas products were collected from the gas outlet and self-injected  
17 into an online gas chromatograph (GC, FULI GC9790PLUS) equipped with flame  
18 ionization detector (FID) and thermal conductivity detector (TCD) for quantitative  
19 measurements. The CO<sub>2</sub>RR test was performed via chronoamperometry measurement  
20 with different applied potential for 1 h without IR compensation. Liquid samples were  
21 collected after 1 h electrolysis and measured by <sup>1</sup>H NMR (JEOL JNM ECZ600R 600  
22 S2 MHz) with DMSO as an internal standard.

23 All potentials were converted to the reversible hydrogen electrode (RHE)  
24 according to the following equation:

25 
$$E(\text{RHE}) = E(\text{Ag}/\text{AgCl}) + 0.197 + 0.0592 \times \text{pH} \dots \dots \dots (1)$$

26 The Faradaic efficiency during the CO<sub>2</sub>RR was calculated by the following  
27 equation:

28 
$$\text{FE}(\%) = \frac{e \times F \times n}{Q_{\text{total}}} \times 100\% \dots \dots \dots (2)$$

1 where  $e$  is the number of electrons transferred in the formation of certain products,  
2  $F$  is the Faraday constant ( $96485 \text{ C mol}^{-1}$ ),  $n$  is the moles of certain products, and  $Q_{total}$   
3 is the total charge consumed during  $\text{CO}_2\text{RR}$ .

4 The long-term stability test was operated by chronopotentiometry mode and the  
5 current density was fixed at  $500 \text{ mA cm}^{-2}$ . The electrolyte consisted of 100 mL of 3 M  
6 KOH solution, which was replaced as needed during the testing period to maintain  
7 similar ion concentrations and conductivity in the catholyte.

### 8 **Electrochemical properties of different electrodes.**

9 LSV was employed at a scan rate of  $50 \text{ mV s}^{-1}$  in 3 M KOH electrolyte under both  
10 Ar- and  $\text{CO}_2$ -fed conditions.

11 Electrochemical surface area (ECSA) measurements were applied by double-layer  
12 capacitance method. Non-Faradaic region ( $0.85 \text{ V}$  to  $0.95 \text{ V vs. RHE}$ ) without active  
13 peaks was selected and tested with the cyclic voltammetry (CV) method at scan rates  
14 of 20, 40, 60, 80, 100 and  $120 \text{ mV s}^{-1}$ , respectively. The capacitance currents at  $0.9 \text{ V vs}$   
15 RHE were plotted against the scan rates.

16 Electrochemical impedance spectroscopy (EIS) measurements were performed in  
17 a flow cell at room temperature. The EIS measurements were carried out in 3M KOH  
18 aqueous solution at different potentials, with frequencies ranging from 0.01 Hz to 100  
19 kHz at an amplitude of 5 mV.

20 The  $\text{OH}^-$  adsorption reaction was carried out in an Ar-saturated 3 M KOH  
21 electrolyte using the CV at a sweep rate of  $100 \text{ mV s}^{-1}$ . The potential ranged from -  
22  $0.374$  to  $0.626 \text{ V vs. RHE}$ .

### 23 **Density Functional Theory (DFT) Calculations**

24 The first principle DFT calculations were conducted using the Vienna Ab initio  
25 Simulation Package (VASP)<sup>4</sup> with the projector augmented wave (PAW)<sup>5</sup> method. The  
26 generalized gradient approximation (GGA) was used with the Perdew-Burke-Ernzerhof  
27 (PBE) exchange-correlation functional<sup>6</sup>. The energy cutoff for the plane wave basis  
28 expansion was set to 400 eV. The Brillouin zone was sampled by the Gamma-centered

1 scheme using a  $1 \times 1 \times 1$  k-point grid. During the geometry optimization and electronic  
2 structure calculations, the convergence criterion was set to  $10^{-4}$  eV/atom for energy and  
3  $0.05$  eV/Å for the maximum force on atoms.

4 The slab model of Cu(100) and Cu(100)/Cu(111) surface were constructed with a  
5 vacuum layer of  $15$  Å, and the atoms were fully relaxed. The Gibbs free energy of  
6 reaction intermediates was evaluated using the Computational Hydrogen Electrode  
7 (CHE) method, as described by the following equation:

$$8 \quad G = H - T\Delta S = E + E_{ZPE} - TS \dots \dots \dots (3)$$

9 where  $E$  is the total energy from the DFT calculation,  $E_{ZPE}$  is the zero-point energy,  $S$   
10 is the entropy, and  $T$  is the temperature ( $298$  K). The free energy calculations for the  
11 molecules and intermediates during reactions were referenced to  $H_2$ ,  $H_2O$ , and  $CH_4$   
12 molecules based on the following reactions<sup>7</sup>:

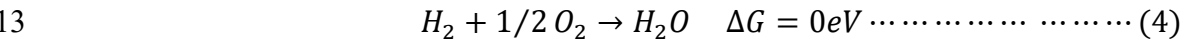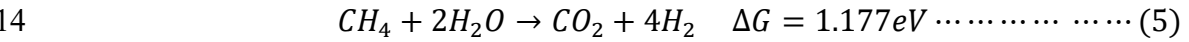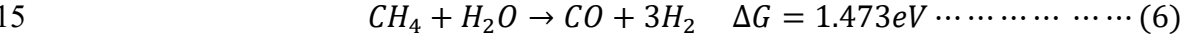

# 1 Supplementary Figures

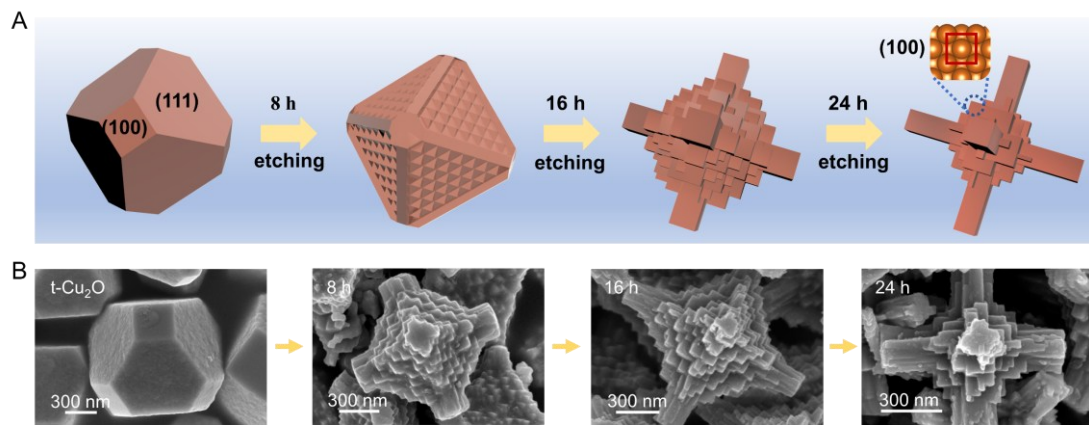

3 Figure S1. (A) Schematic diagrams of the synthesis of oc-Cu<sub>2</sub>O. (B) SEM images of  
4 the materials for different etching times.

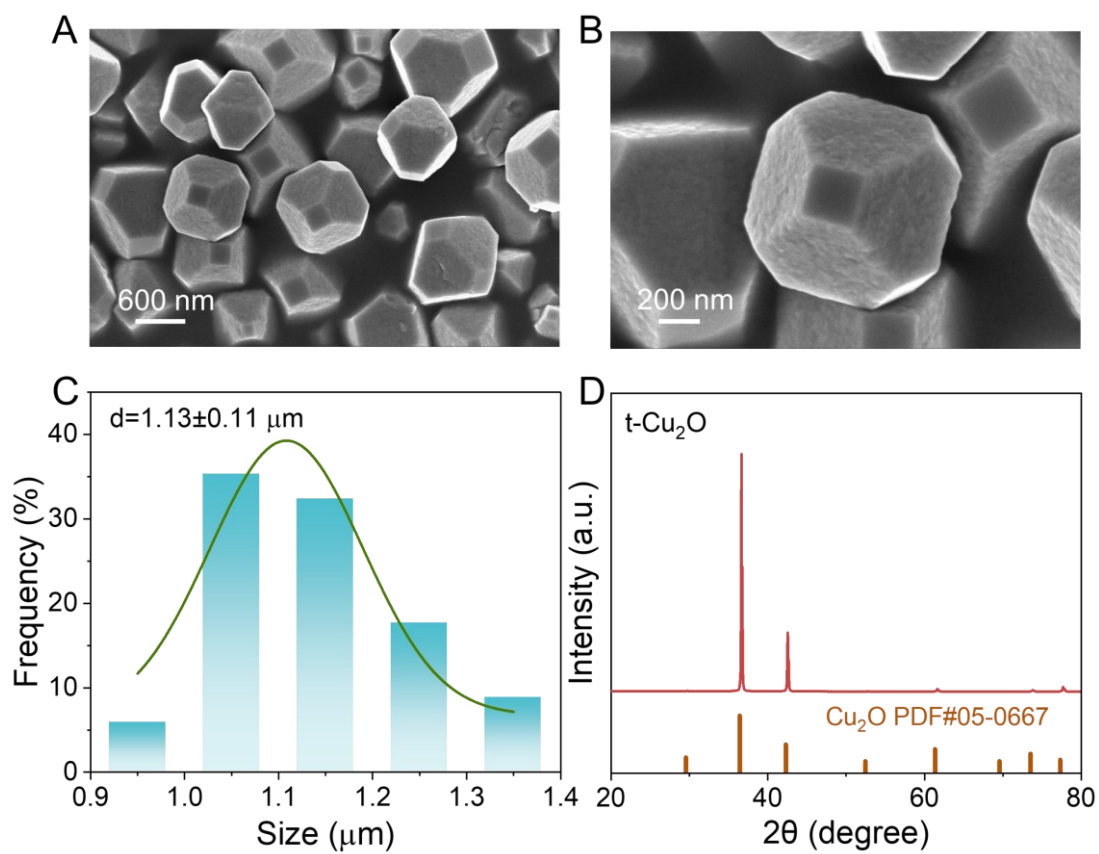

1

2 Figure S2. (A-B) SEM images, (C) particle size statistics and (D) XRD pattern of t-

3 Cu<sub>2</sub>O.

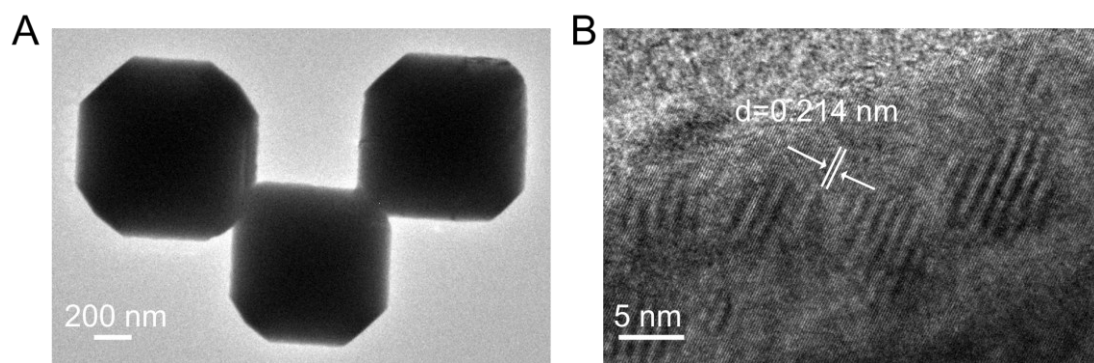

1

2 Figure S3. (A) TEM image and (B) HRTEM image of t-Cu<sub>2</sub>O.

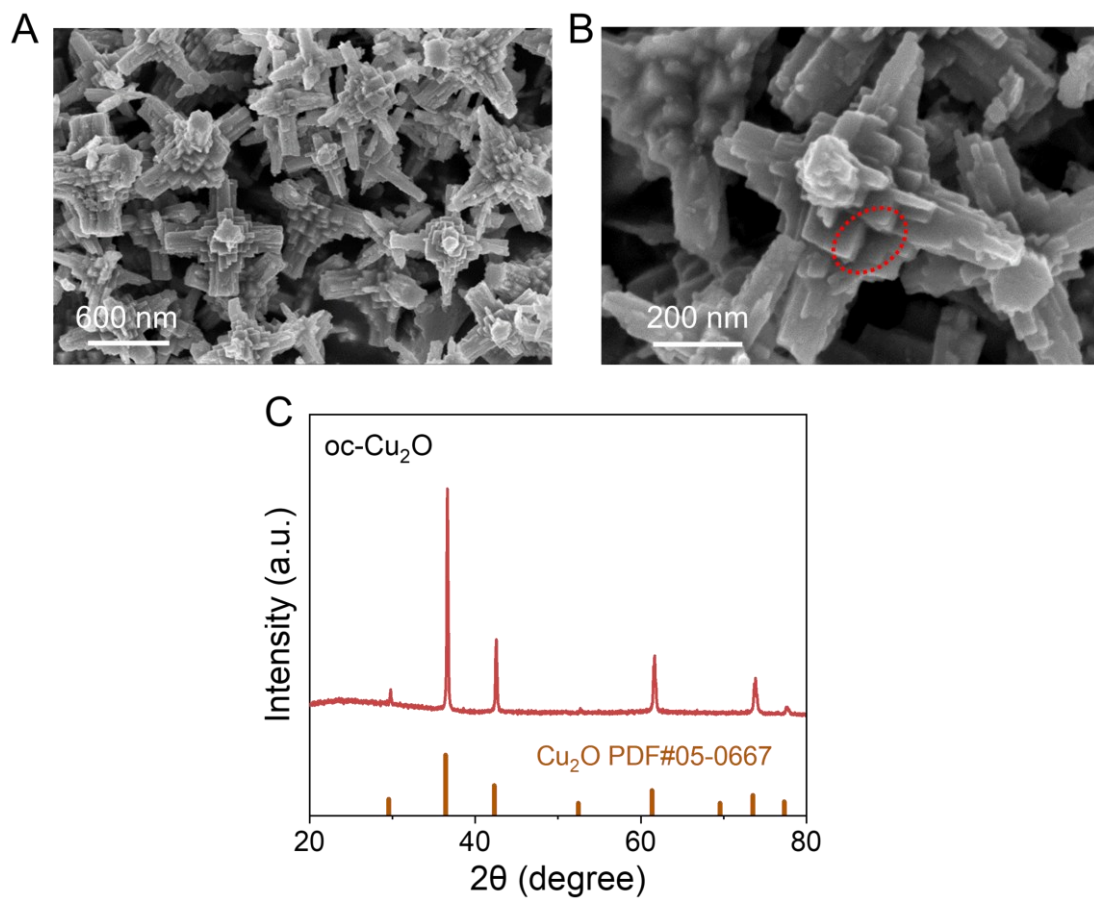

1

2 Figure S4. (A-B) SEM images and (C) XRD pattern of oc-Cu<sub>2</sub>O.

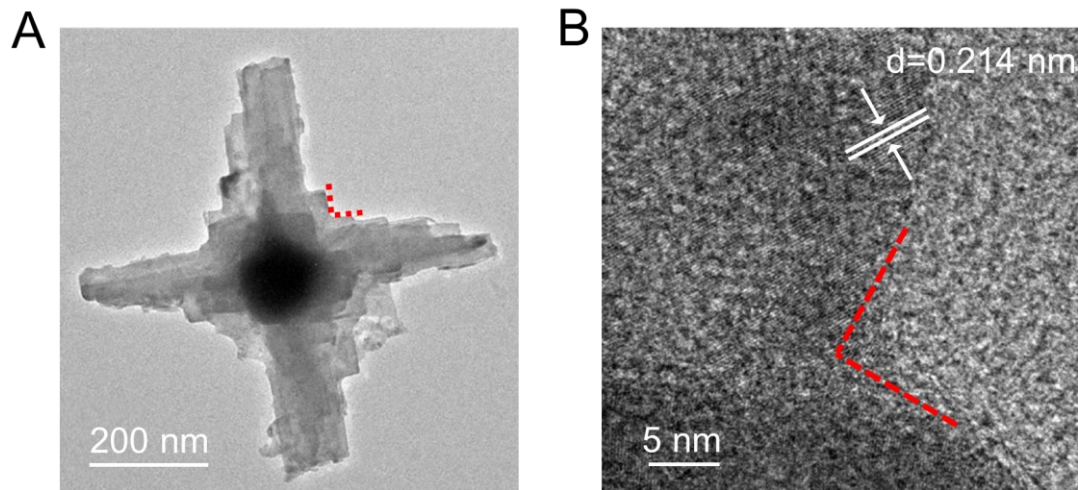

1

2 Figure S5. (A) TEM image and (B) HRTEM image of  $oc\text{-Cu}_2\text{O}$ .

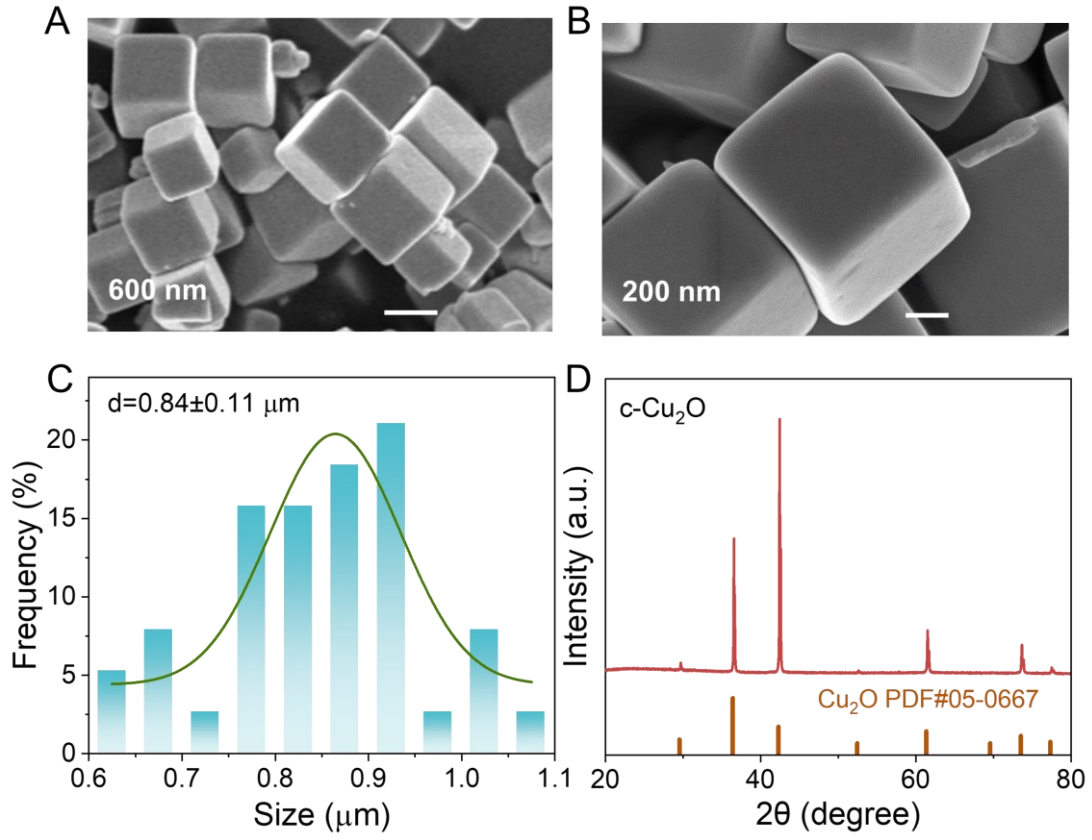

1

2 Figure S6. (A-B) SEM images, (C) particle size statistics and (D) XRD pattern of c-

3 Cu<sub>2</sub>O.

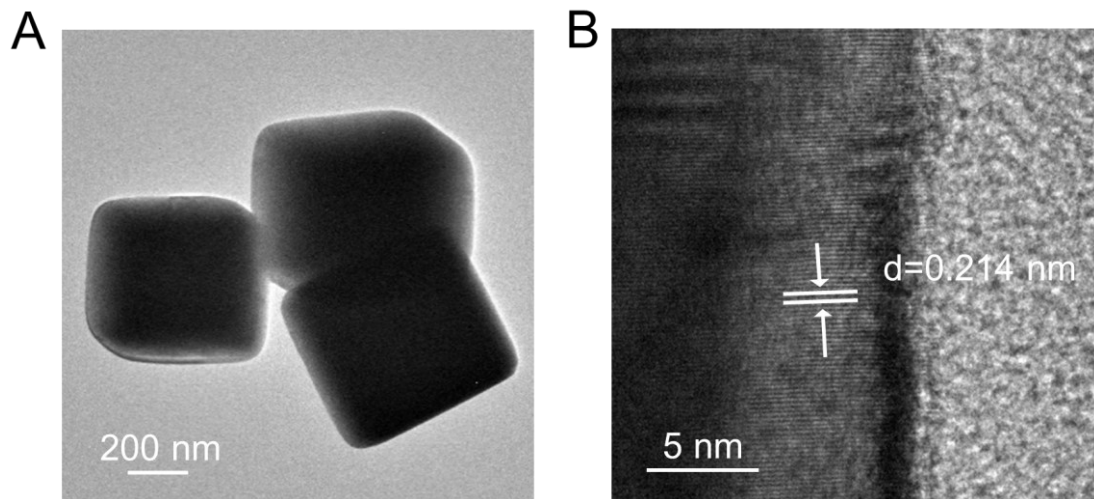

1

2 Figure S7. (A) TEM image and (B) HRTEM image of c-Cu<sub>2</sub>O.

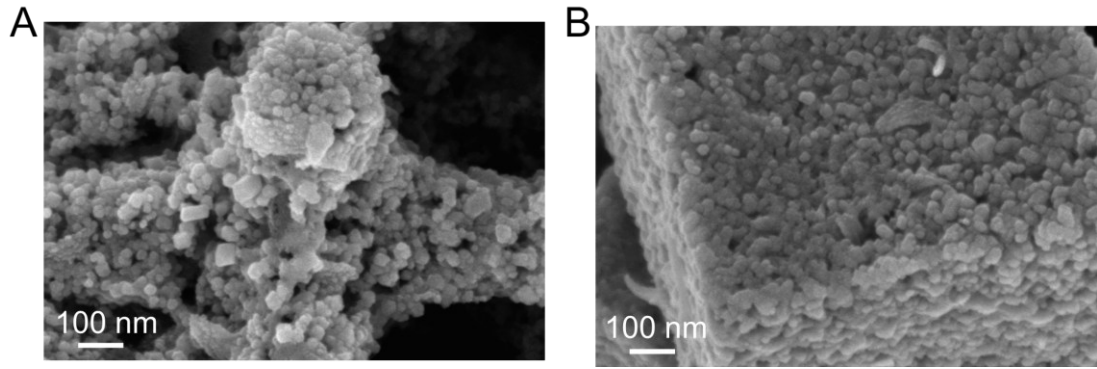

1

2 Figure S8. SEM images of the materials after LSV treatment. (A) oc-Cu<sub>2</sub>O. (B) c-Cu<sub>2</sub>O.

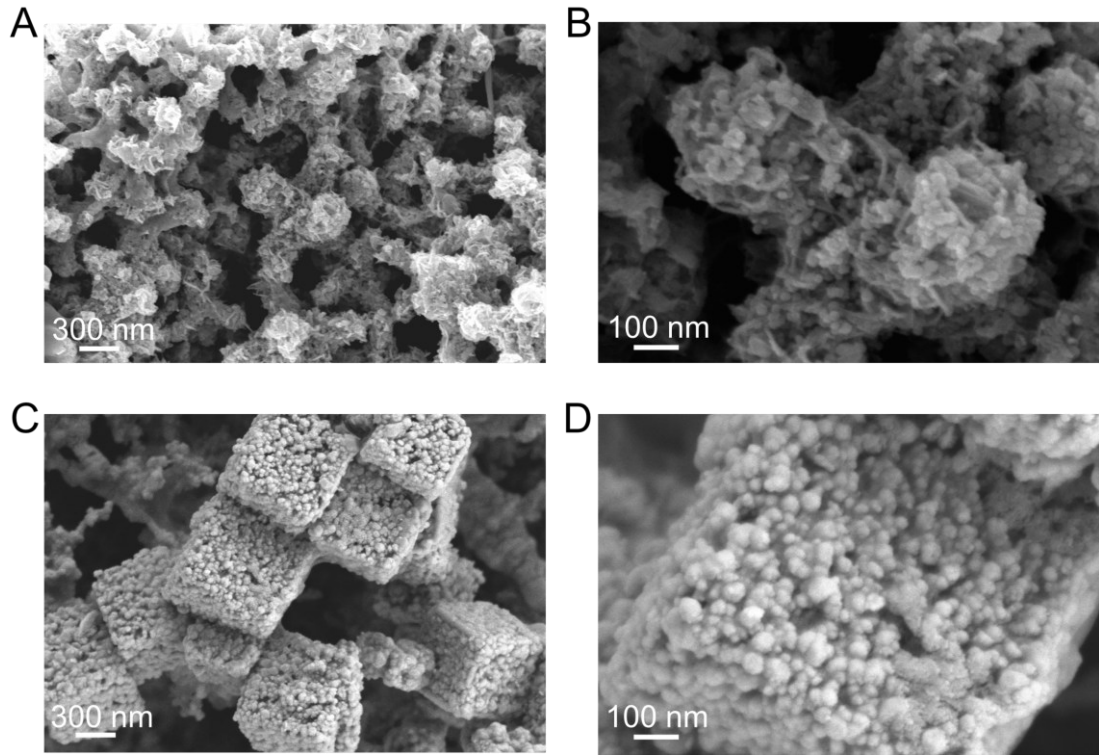

1

2 Figure S9. SEM images of the materials after CA treatment for 8 min. (A-B) oc-Cu<sub>2</sub>O.

3 (C-B) c-Cu<sub>2</sub>O.

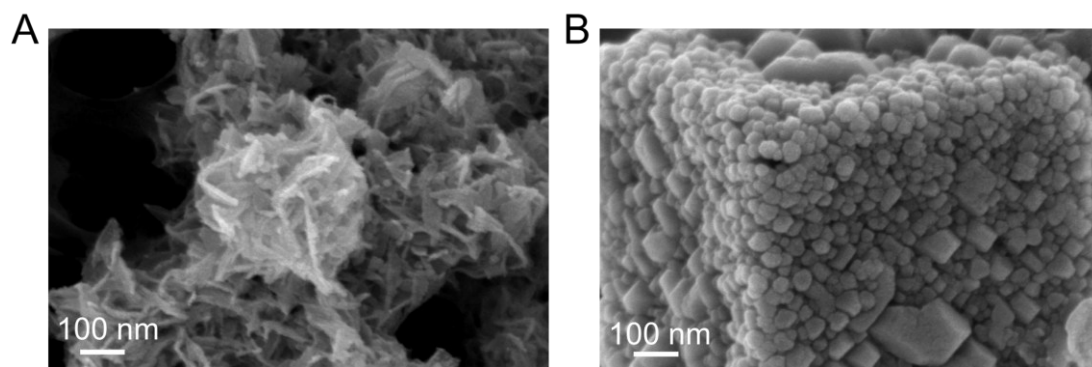

1

2 Figure S10. SEM images of the materials after CA treatment for 15 min. (A) oc-Cu<sub>2</sub>O.

3 (B) c-Cu<sub>2</sub>O.

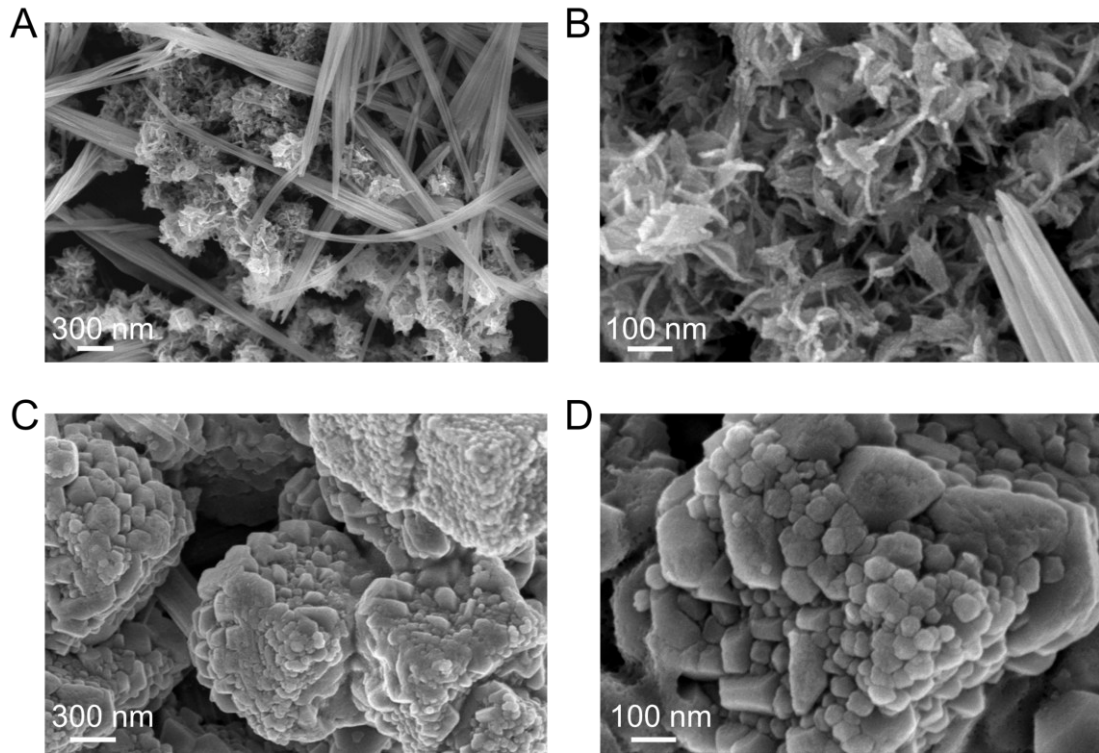

1

2 Figure S11. SEM images of the materials after CA treatment for 23 min. (A-B) oc-Cu<sub>2</sub>O.

3 (C-D) c-Cu<sub>2</sub>O.

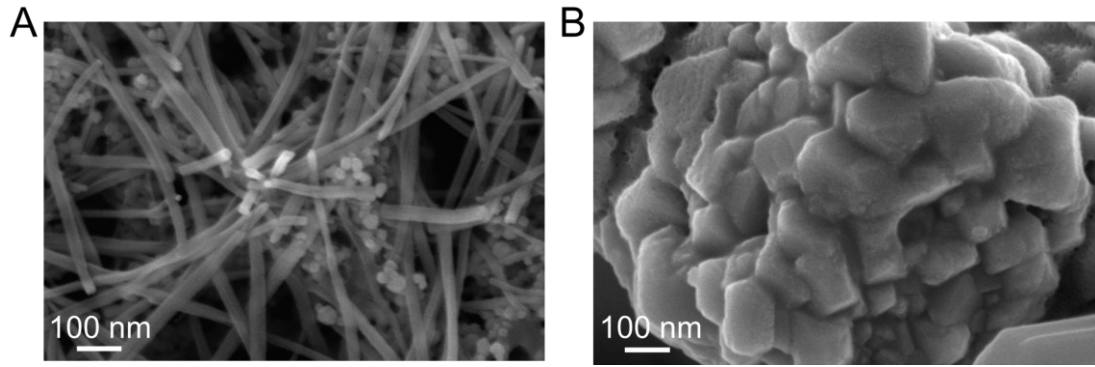

1

2 Figure S12. SEM images of the materials s after CA treatment for 30 min. (A) oc-Cu<sub>2</sub>O.

3 (B) c-Cu<sub>2</sub>O.

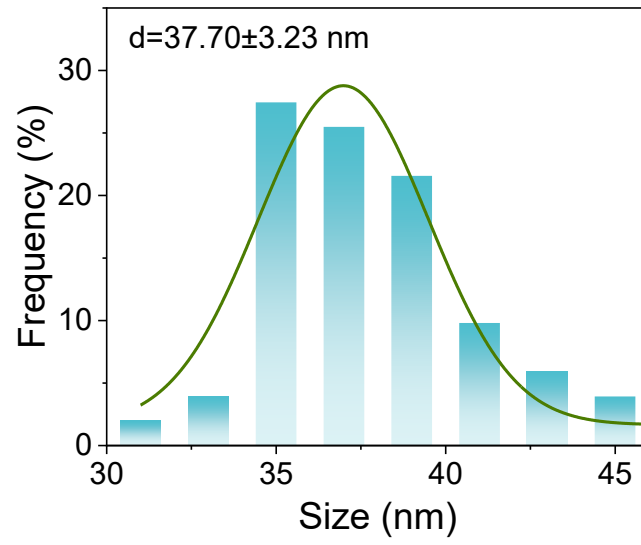

1

2 Figure S13. Particle size statistics of NR-Cu.

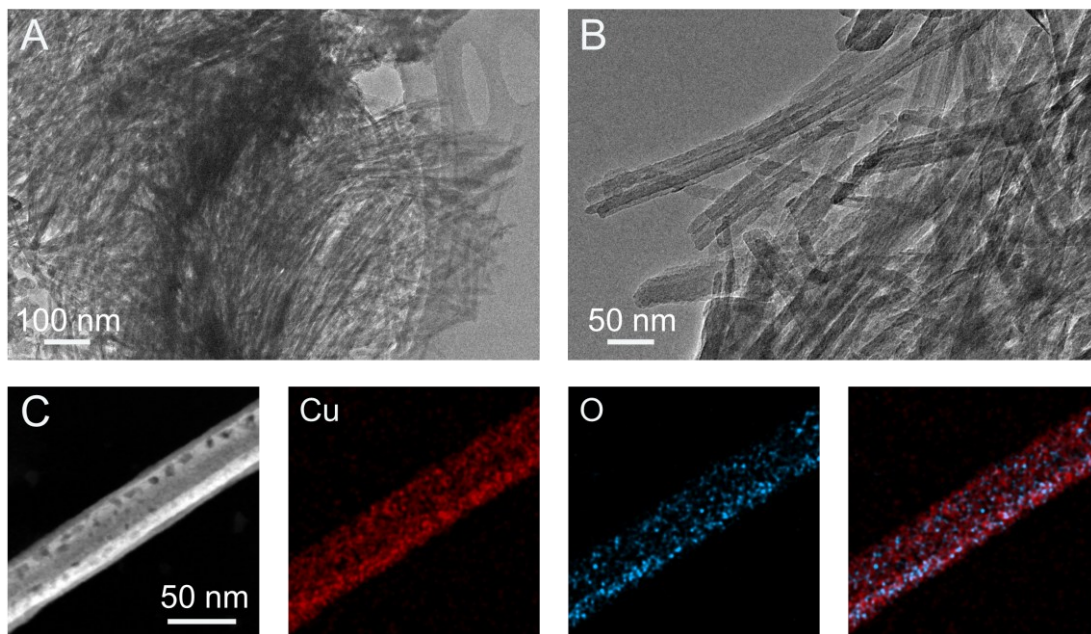

1

2 Figure S14. (A-B) TEM images of NR-Cu and (C) corresponding EDS elemental  
3 mapping images.

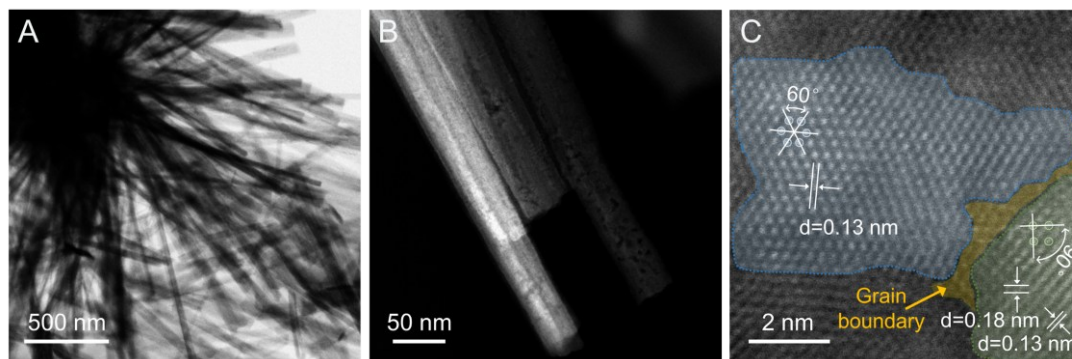

1

- 2 Figure S15. (A-B) HAADF-STEM image and (C) atomically resolved HAADF-STEM  
3 images of NR-Cu. The region outlined in blue, green and yellow represent Cu(111) fact,  
4 Cu(100) fact and disordered grain boundary, respectively.

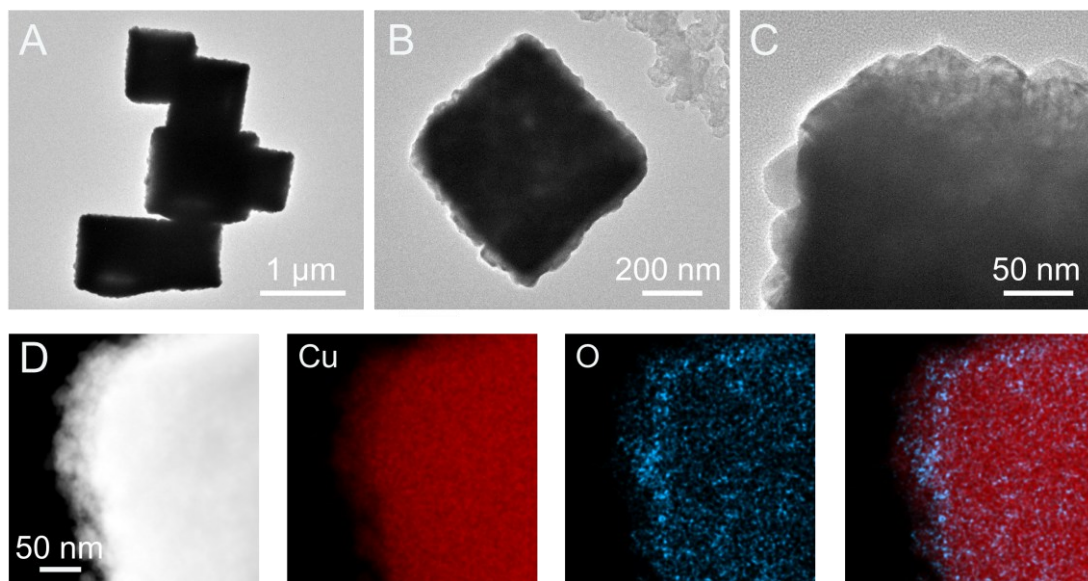

1

2 Figure S16. (A-C) TEM images and (D) corresponding EDS elemental mapping  
3 images of C-Cu.

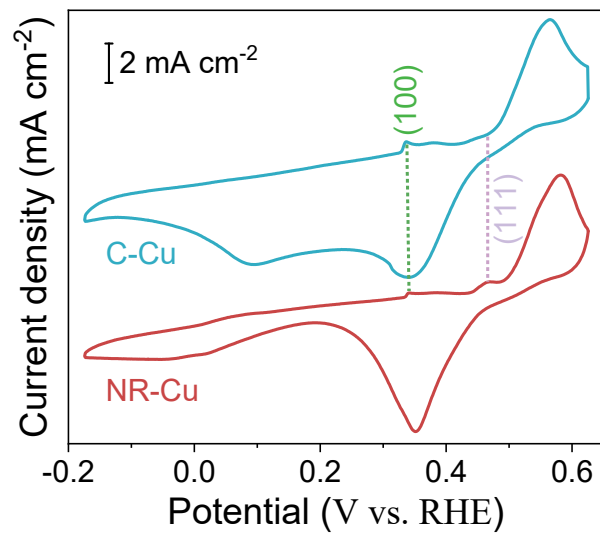

1

2 Figure S17. OH<sup>-</sup> electroadsorption profiles. CV curves of NR-Cu (red) and C-Cu (blue)  
 3 in Ar-saturated 3 M KOH, Scan rate = 100 mV s<sup>-1</sup>. Different Cu facets exhibit unique  
 4 OH-adsorption/desorption peaks in the CV curves. The peaks centered at ca. 0.35 and  
 5 0.46 V vs. RHE can be assigned to the OH-electrosorption on Cu(100) and Cu(111),  
 6 respectively<sup>8</sup>.

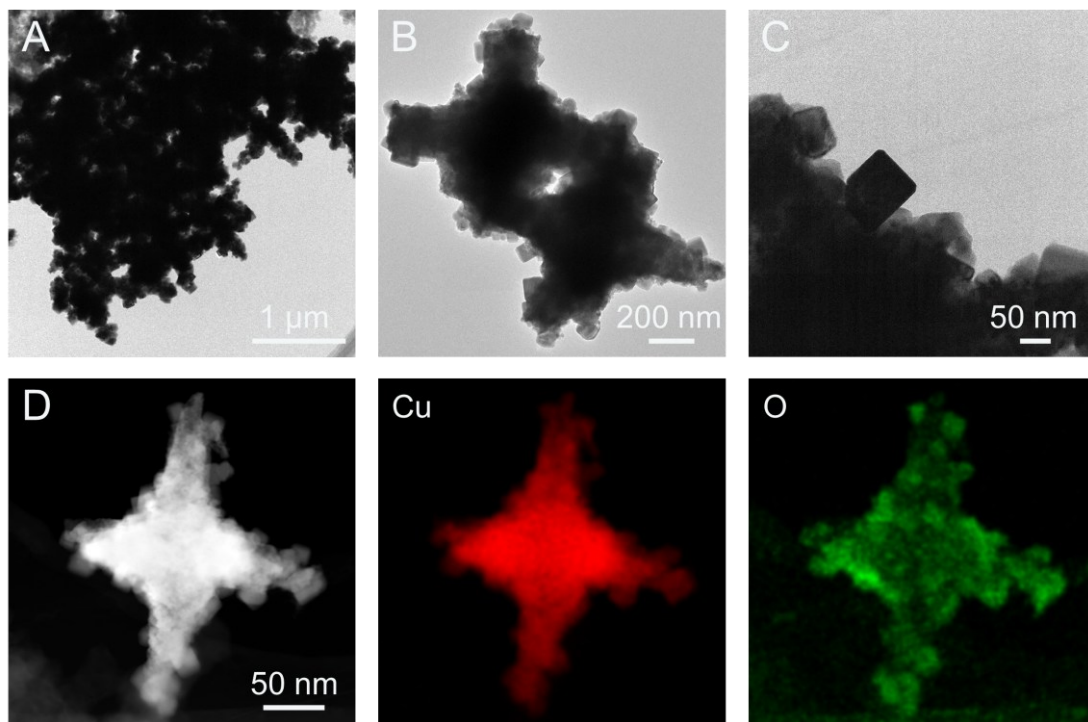

1

2 Figure S18. (A-C) TEM images and (D) corresponding EDS elemental mapping images  
3 of OC-Cu.

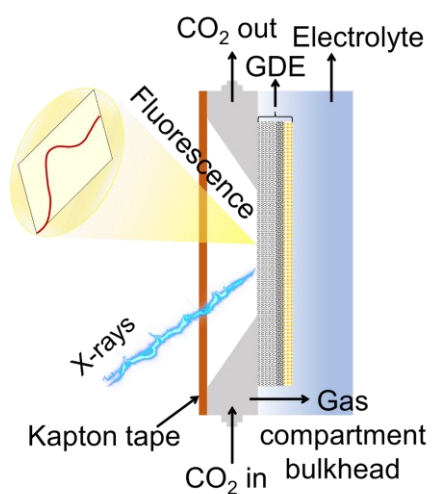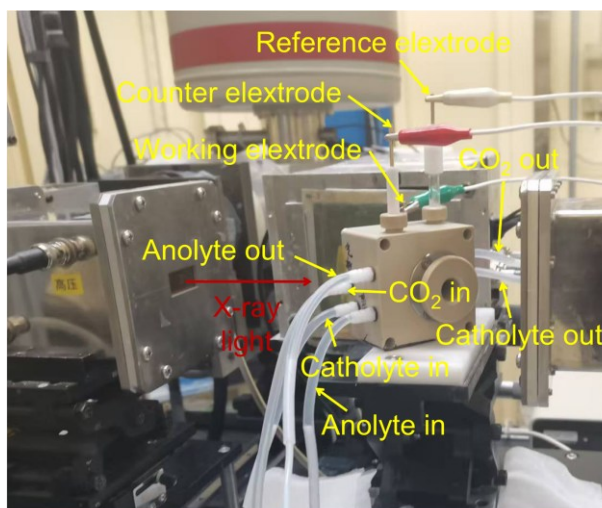

1

2 Figure S19. Schematic diagram (left) and photograph (right) of the *in-situ* XAS  
 3 experimental setup.

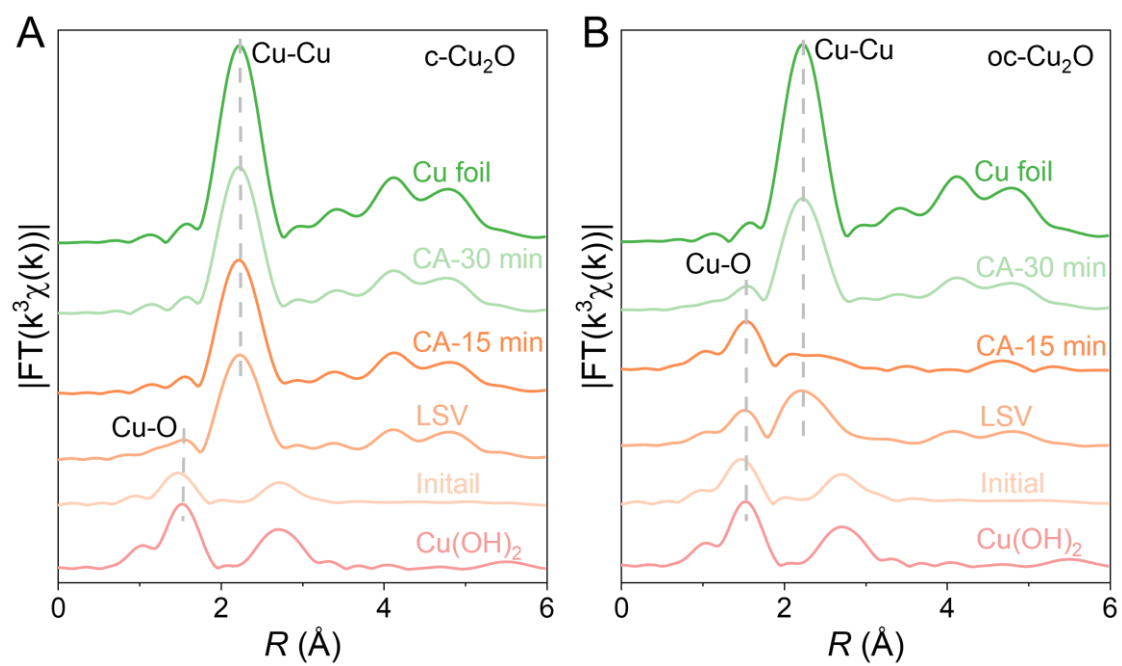

1

2 Figure S20. EXAFS spectra of (A) c-Cu<sub>2</sub>O and (B) oc-Cu<sub>2</sub>O at different treatment times.

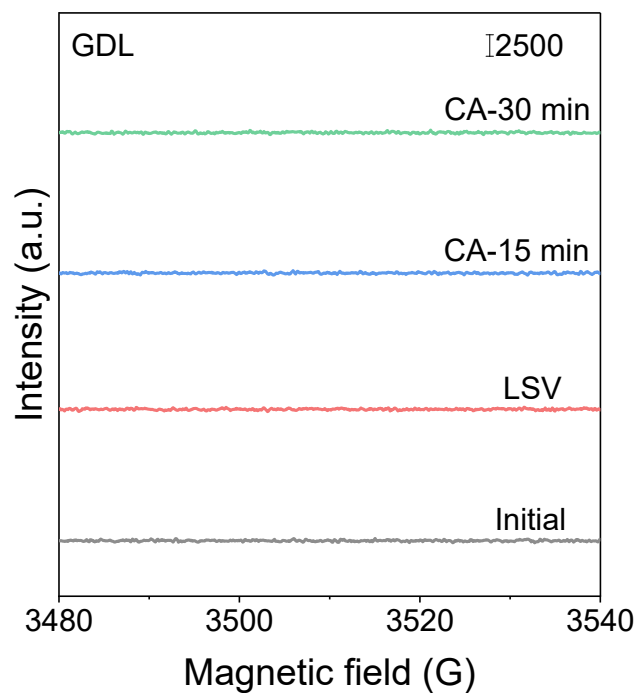

1

2 Figure S21. *In-situ* EPR spectra of GDL (without catalytic material) in 3 M KOH  
3 electrolyte at different treatment times. No characteristic  $\bullet\text{OH}$  electron paramagnetic  
4 resonance signals were detected for the GDL (without catalytic material) during LSV  
5 activation and CA treatment. The results excluded the possibility that the KOH  
6 electrolyte itself generated strongly oxidative radicals.

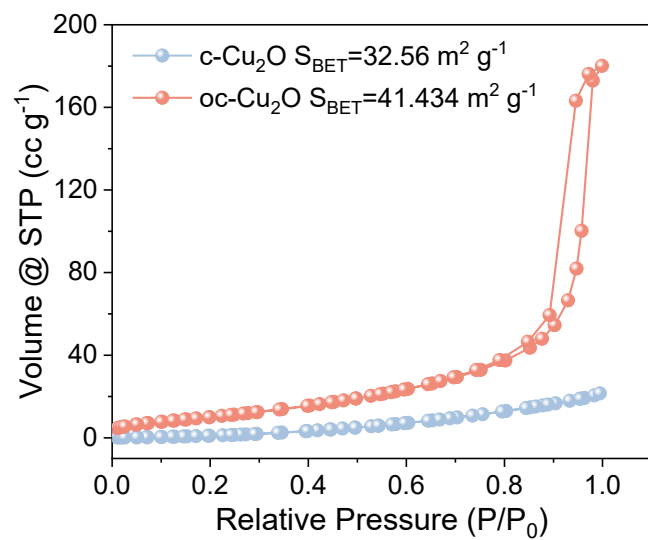

1

2 Figure S22. Nitrogen adsorption-desorption isotherms of oc-Cu<sub>2</sub>O (red) and c-Cu<sub>2</sub>O

3 (blue).

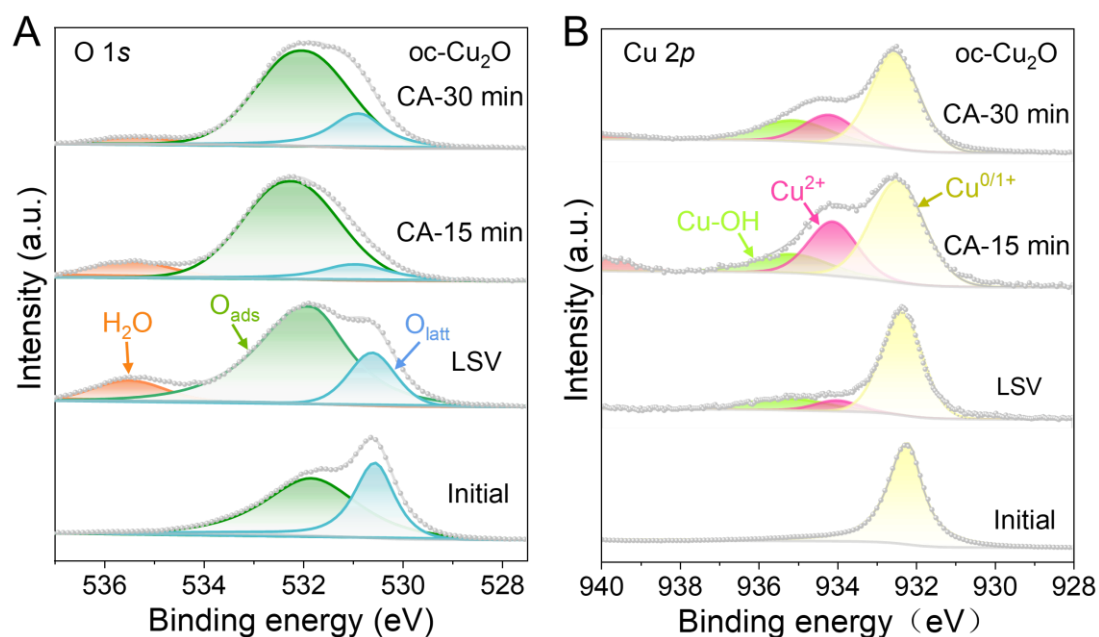

1

2 Figure S23. (A) O 1s and (B) Cu 2p spectra for oc-Cu<sub>2</sub>O at different treatment times.

3 The O 1s spectrum of oc-Cu<sub>2</sub>O displayed characteristic peaks corresponding to  
 4 adsorbed oxygen (O<sub>ads</sub>, ~532.4 eV) and O<sub>latt</sub> (~530.6 eV)<sup>9,10</sup>. LSV activation drastically  
 5 increased the O<sub>ads</sub> signal, which became dominant, likely attributable to the conversion  
 6 of O<sub>latt</sub> into surface-adsorbed •OH after accepting electrons<sup>10,11</sup>. Upon extending CA to  
 7 15 minutes for LSV-pretreated oc-Cu<sub>2</sub>O, the O<sub>latt</sub> signal further dropped while O<sub>ads</sub> grew.  
 8 The corresponding Cu 2p spectrum developed features of Cu-OH (~935.2 eV) and  
 9 intensified Cu<sup>2+</sup> signatures (~934.1 eV), suggesting •OH-mediated oxidation of Cu<sup>10-12</sup>.  
 10 After prolonging CA treatment to 30 minutes, the Cu 2p spectra showed a decrease in  
 11 the characteristic peaks corresponding to Cu-OH and Cu<sup>2+</sup> species, indicating the  
 12 electroreduction of the oxidized Cu species.

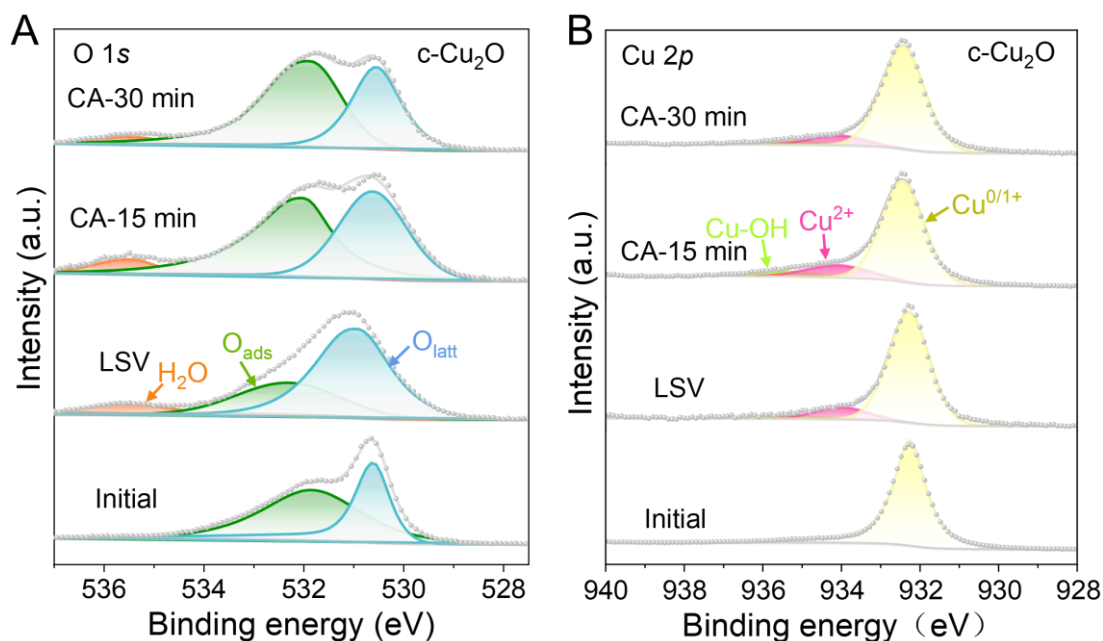

1

2 Figure S24. (A) O 1s and (B) Cu 2p spectra for c-Cu<sub>2</sub>O at different treatment times.

3 The O 1s spectrum of c-Cu<sub>2</sub>O displayed characteristic peaks corresponding to adsorbed  
 4 oxygen ( $O_{\text{ads}}$ , ~532 eV) and  $O_{\text{latt}}$  (~530.6 eV). The Cu 2p spectrum of c-Cu<sub>2</sub>O displayed  
 5 characteristic peaks corresponding to  $Cu^{2+}$  signatures (~934.1 eV) and Cu-OH (~935.2  
 6 eV). Compared to oc-Cu<sub>2</sub>O, c-Cu<sub>2</sub>O exhibited relatively slower  $O_{\text{ads}}$  growth and less  
 7 Cu-OH formation during LSV activation and CA treatment. Thus, possibly constrained  
 8 by its cubic structure, c-Cu<sub>2</sub>O converts a relatively lower proportion of its  $O_{\text{latt}}$  into •OH  
 9 species.

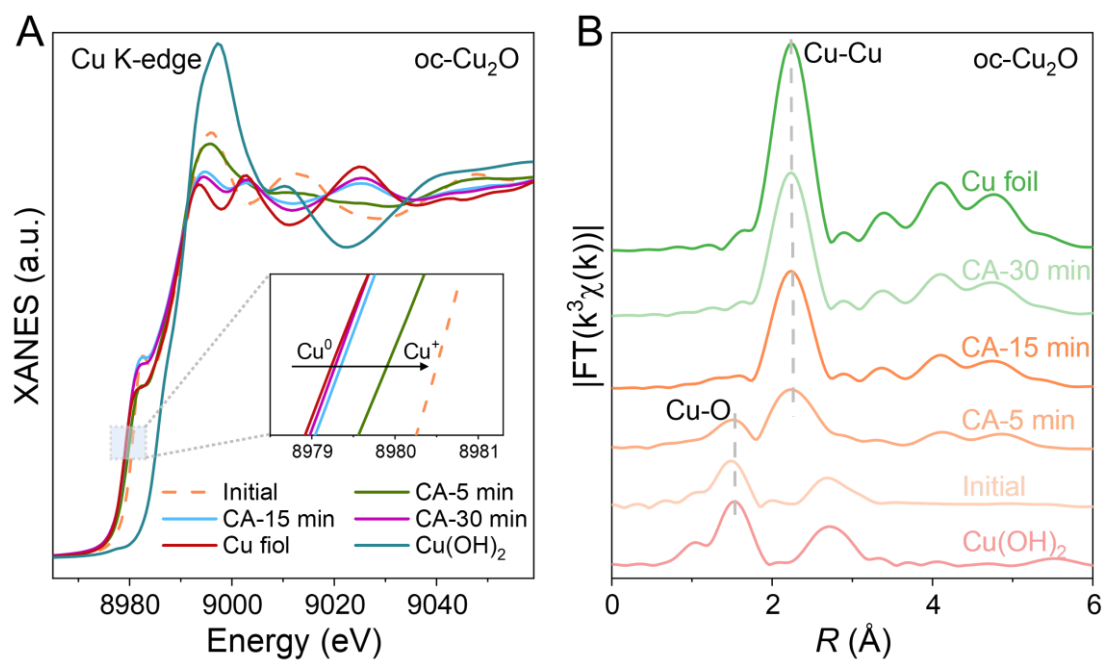

1

2 Figure S25. (A) Cu K-edge XANES and (B) EXAFS spectra for  $oc-Cu_2O$  under 30-min

3 CA treatment (without LSV).

1

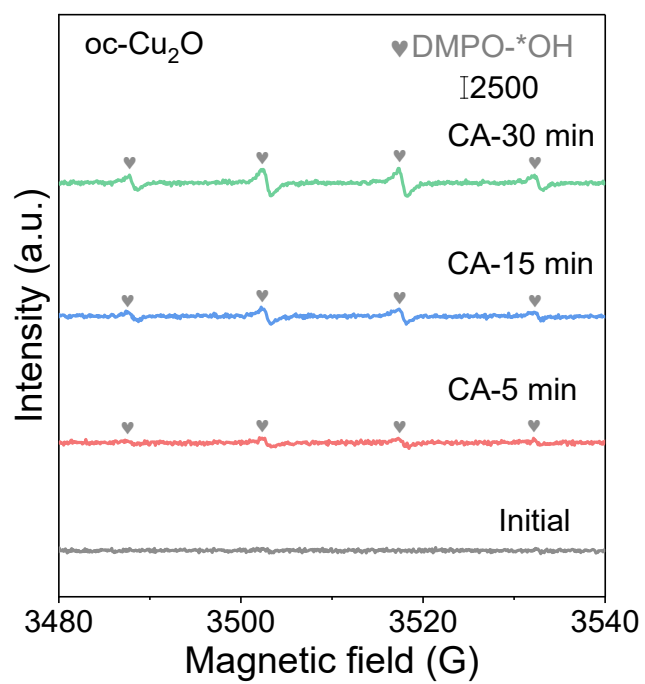

2

3 Figure S26. *In-situ* EPR spectra of  $oc-Cu_2O$  during 30-min CA treatment (without LSV)

4 in 3 M KOH electrolyte.

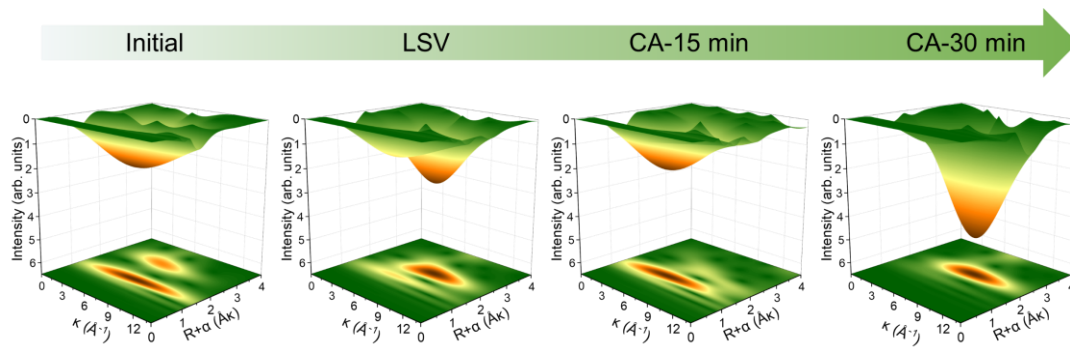

1

2 Figure S27. Contour plots of the Morlet wavelet transform tracking the reduction of oc-

3 Cu<sub>2</sub>O to NR-Cu over time.

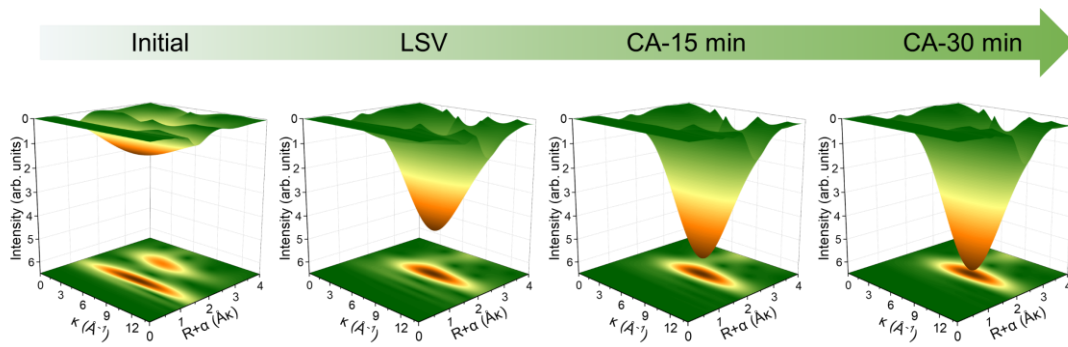

1

2 Figure S28. Contour plots of the Morlet wavelet transform tracking the reduction of c-  
 3  $\text{Cu}_2\text{O}$  to C-Cu over time.

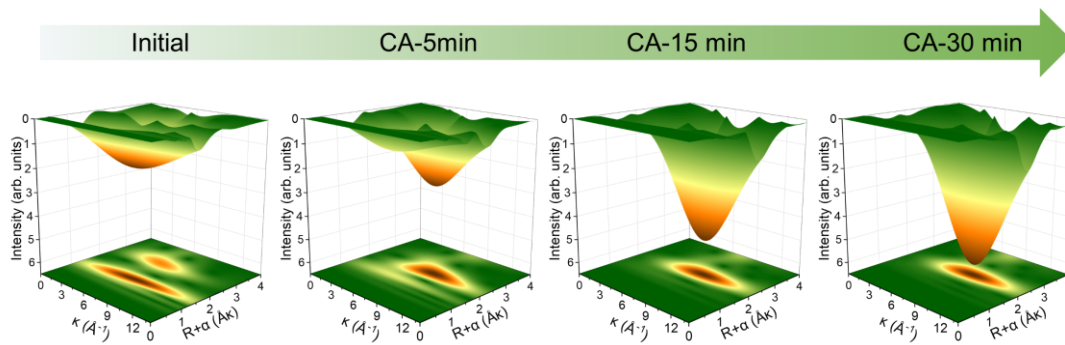

1

2 Figure S29. Contour plots of the Morlet wavelet transform tracking the reduction of oc-

3  $\text{Cu}_2\text{O}$  to OC-Cu over time.

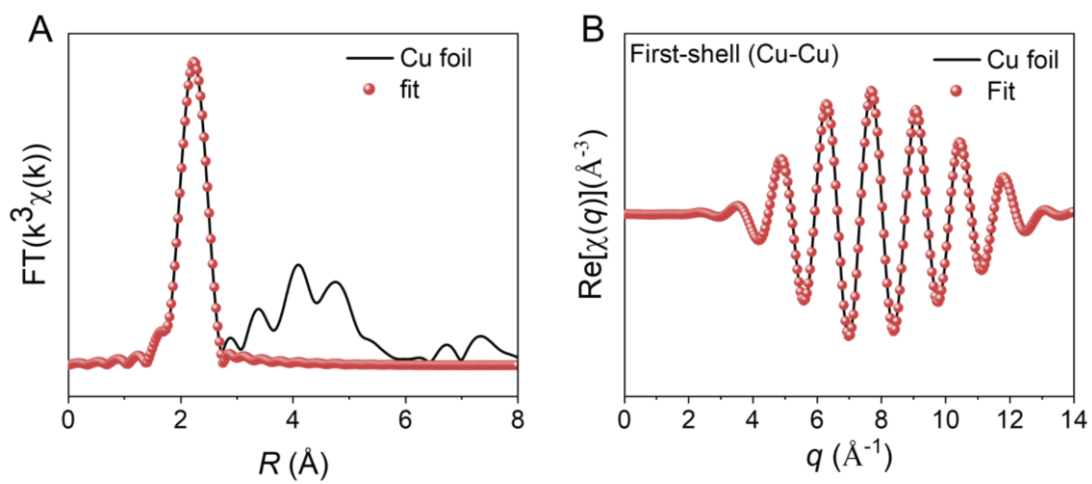

1

2 Figure S30. (A) Cu K-edge EXAFS fitting curves of Cu foil in R space. (B) The back  
 3 ward FT and the corresponding fitting curves for the first shell (Cu-Cu).

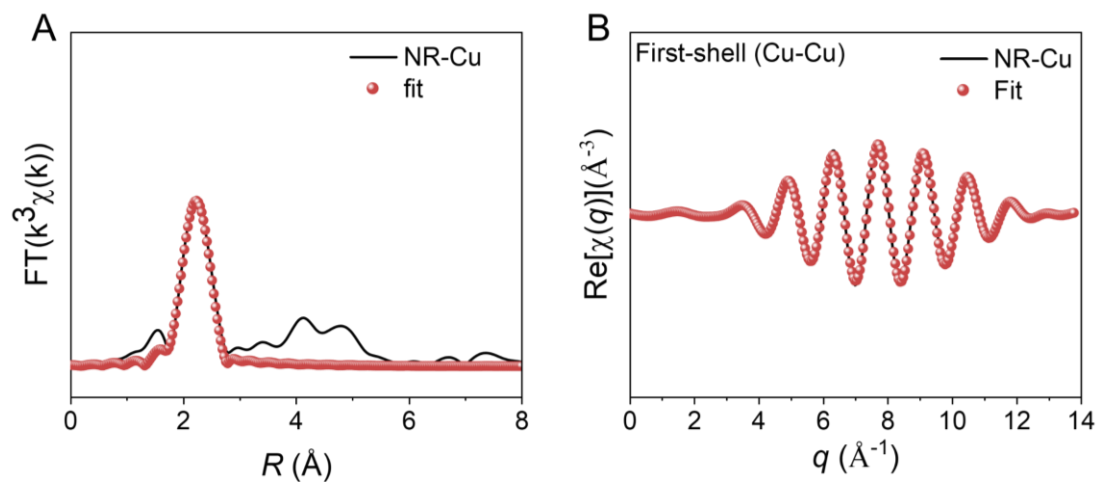

1

2 Figure S31. (A) Cu K-edge EXAFS fitting curves of NR-Cu in R space. (B) The back  
 3 ward FT and the corresponding fitting curves for the first shell (Cu-Cu).

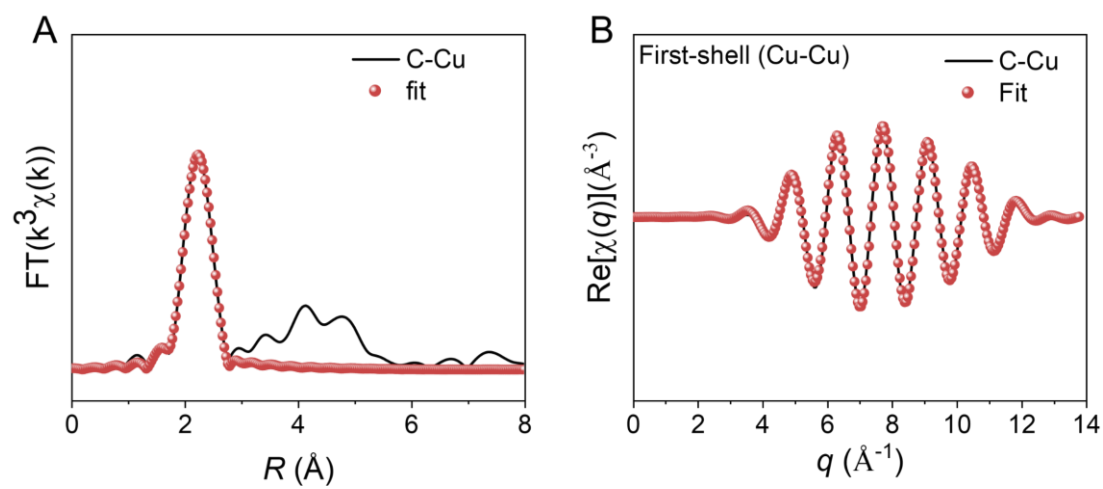

1

2 Figure S32. (A) Cu K-edge EXAFS fitting curves of C-Cu in R space. (B) The back  
 3 ward FT and the corresponding fitting curves for the first shell (Cu-Cu).

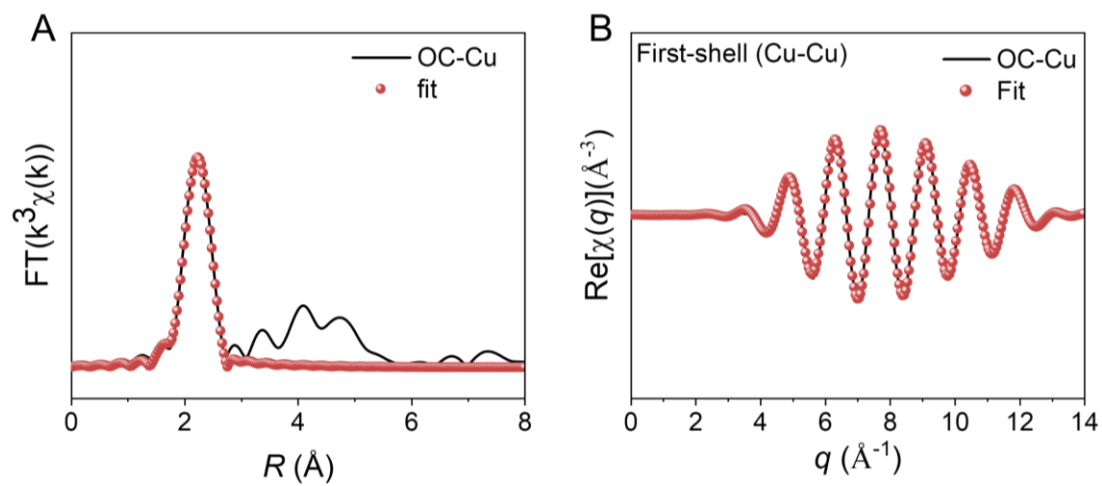

1

2 Figure S33. (A) Cu K-edge EXAFS fitting curves of OC-Cu in R space. (B) The back  
 3 ward FT and the corresponding fitting curves for the first shell (Cu-Cu).

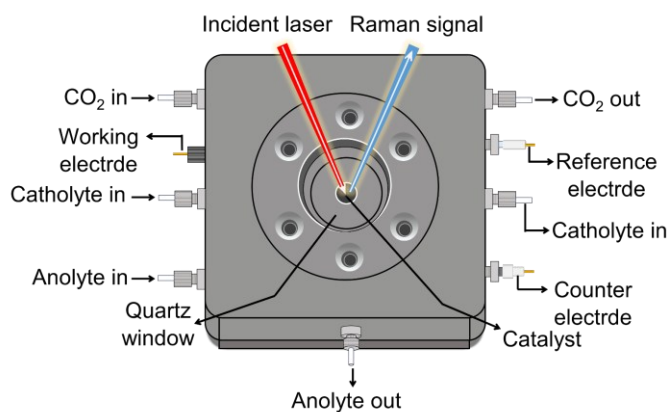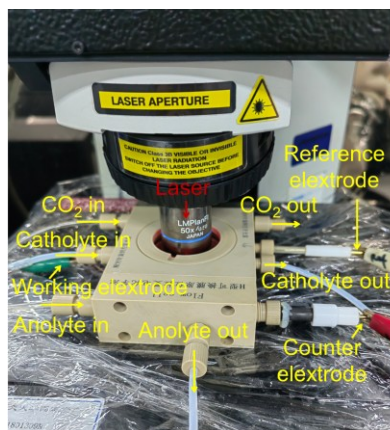

1

2 Figure S34. Schematic diagram (left) and photograph (right) of the *in-situ*  
 3 electrochemical Raman setup.

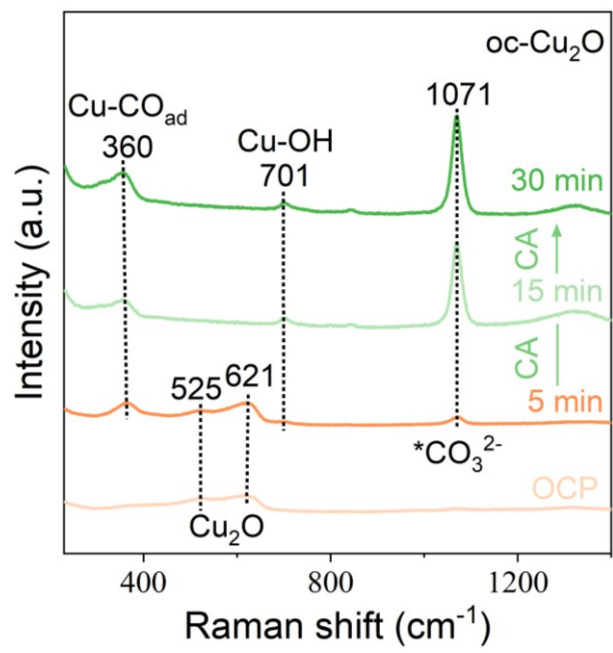

1

2 Figure S35. *In-situ* Raman spectra of oc-Cu<sub>2</sub>O under 30-min CA treatment (without  
 3 LSV).

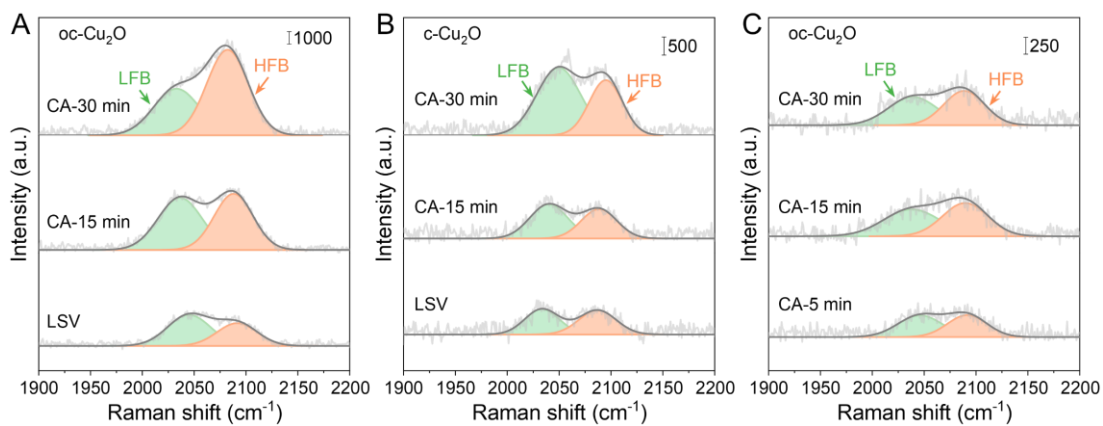

1

2 Figure S36. *In-situ* spectra analysis in the range of 1900-2200  $\text{cm}^{-1}$ . (A) oc- $\text{Cu}_2\text{O}$  during  
 3 LSV activation and subsequent 30 min CA treatment. (B) c- $\text{Cu}_2\text{O}$  during LSV  
 4 activation and subsequent 30 min CA treatment. (C) oc- $\text{Cu}_2\text{O}$  during 30 min CA  
 5 treatment without prior LSV activation.

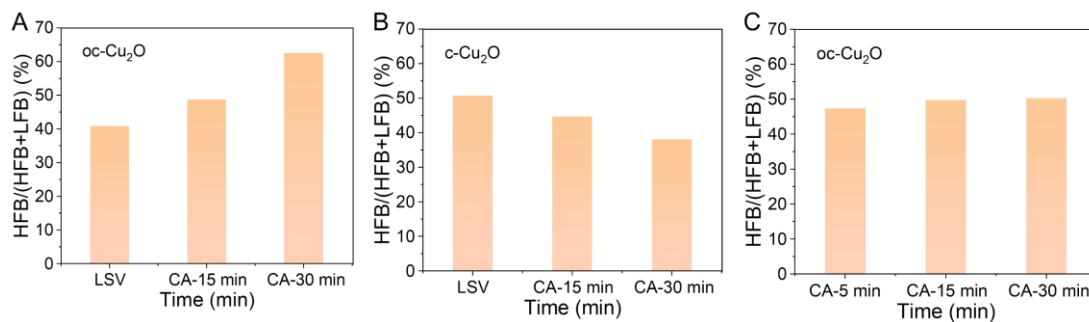

1

2 Figure S37. Comparison of the HFB/(HFB+LFB) ratio tracking the reconstruction  
 3 process of different Cu<sub>2</sub>O samples over time. (A) oc-Cu<sub>2</sub>O to NR-Cu. (B) c-Cu<sub>2</sub>O to C-  
 4 Cu. (C) oc-Cu<sub>2</sub>O to OC-Cu.

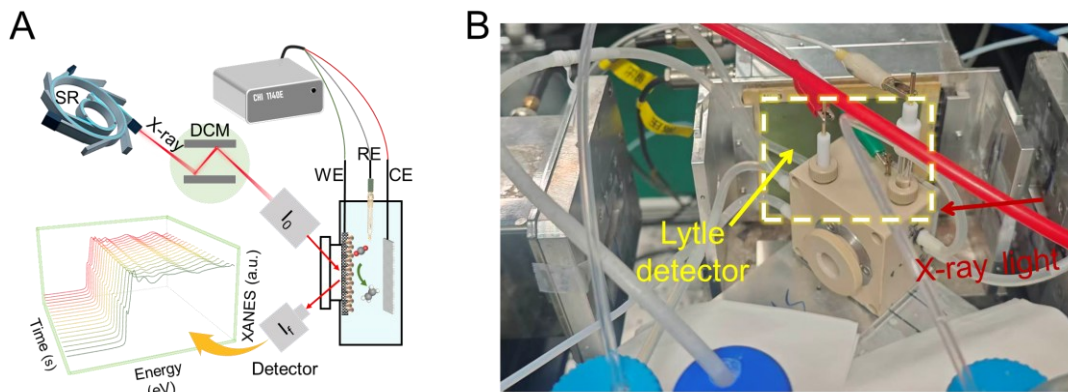

1

2 Figure S38. Schematic diagram (left) and photograph (right) of the *in-situ* time-resolved  
 3 XAS measurement setup.

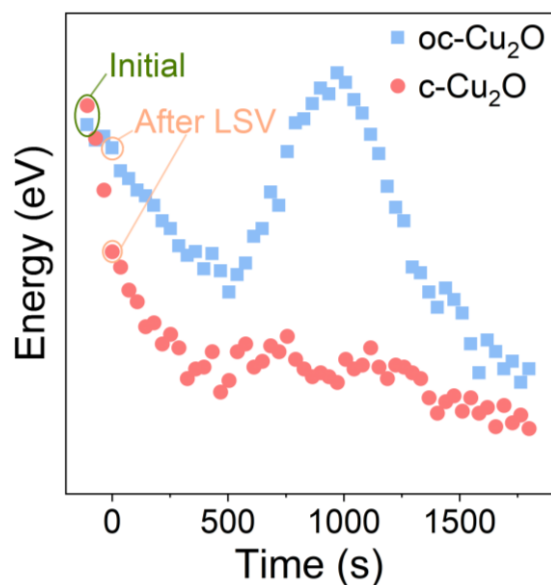

1

2 Figure S39. The Cu K-edge positions ( $F/I_0 = 0.3$ ) of oc-Cu<sub>2</sub>O and c-Cu<sub>2</sub>O against the  
 3 reconstruction reaction time. For oc-Cu<sub>2</sub>O, the Cu K-edge position ( $F/I_0 = 0.3$ ) shifted  
 4 to lower energy at the initial stage of the reaction, then reversed to a higher energy  
 5 direction in the middle stage (exceeding the initial position), and finally shifted back to  
 6 lower energy in the late stage. This evolution pattern involves three distinct stages,  
 7 reflecting a broad valence oscillation. For c-Cu<sub>2</sub>O, the Cu K-edge position ( $F/I_0 = 0.3$ )  
 8 shifted to lower energy as a function of reaction time, reaching its minimum value upon  
 9 completion of the reconstruction. This evolution pattern exhibits a monotonic reduction  
 10 characteristic, with no broad valence oscillation involved.

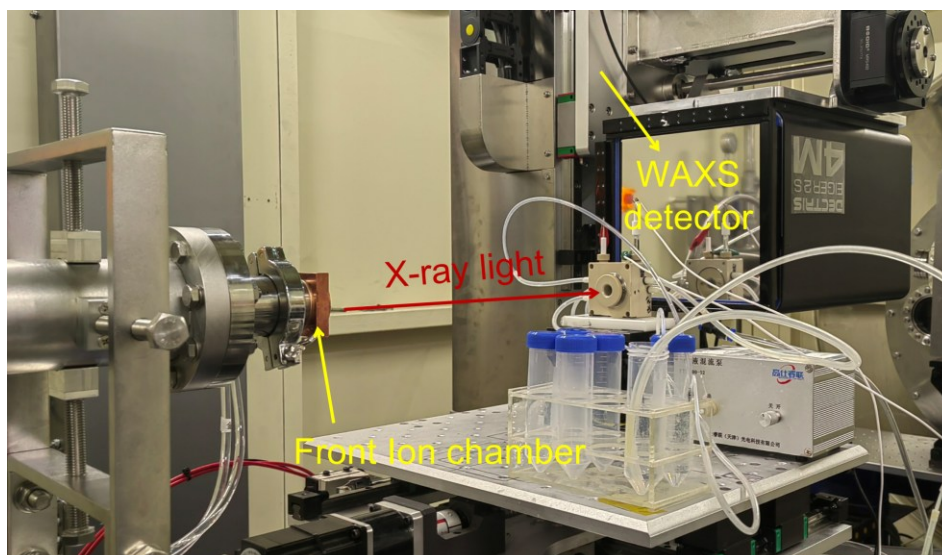

1

2 Figure S40. Photograph of the *in-situ* WAXS setup.

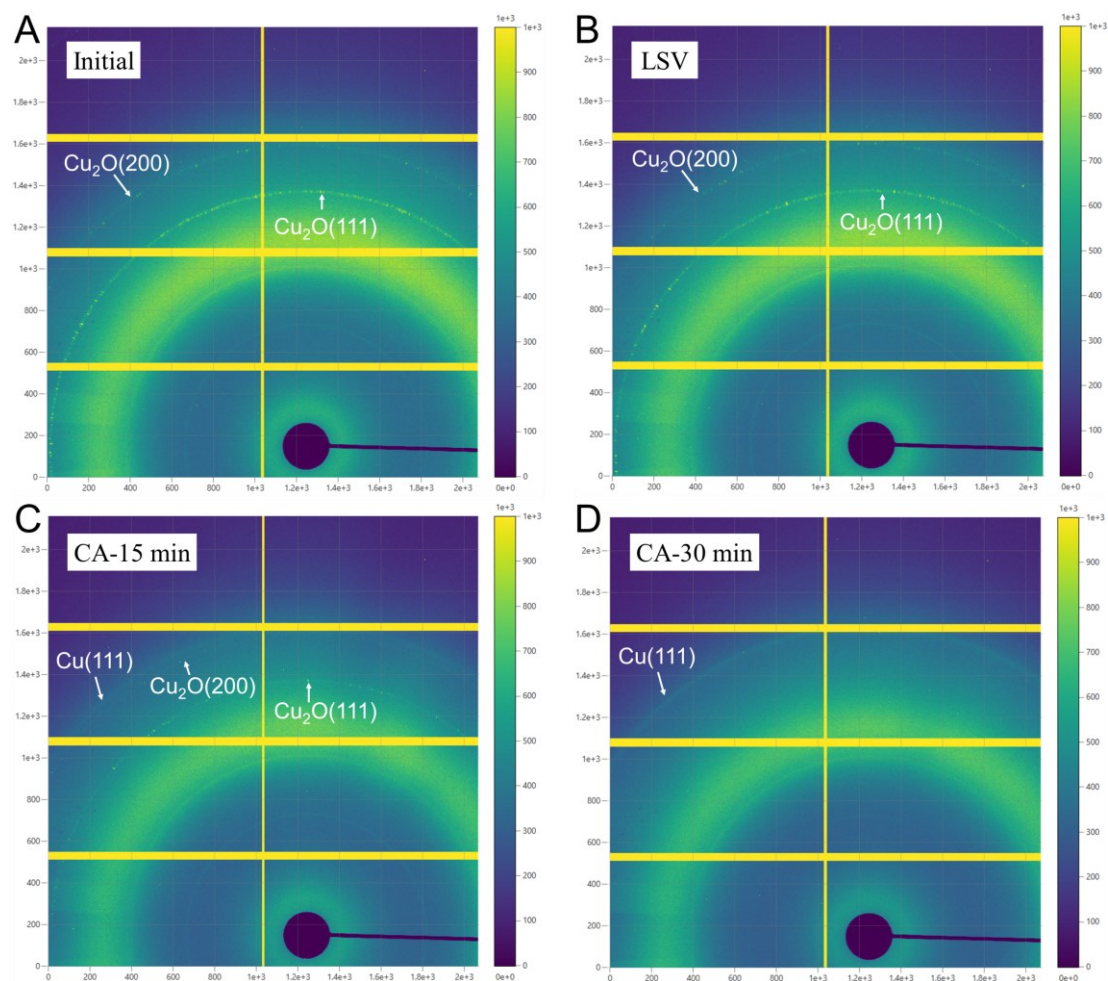

1

2 Figure S41. 2D WAXS patterns of oc-Cu<sub>2</sub>O at different treatment times. (A) Initial. (B)  
 3 After LSV activations. (C) After CA treatment for 15 min. (D) After CA treatment for  
 4 30 min. All scattering rings in the WAXS pattern can be indexed to their characteristic  
 5 crystalline phases. According to the curves of scattering intensity as a function of the  
 6 diffraction angle ( $2\theta$ ), the diffraction rings are assigned to Cu<sub>2</sub>O(111), Cu<sub>2</sub>O(200), and  
 7 Cu(111), respectively.

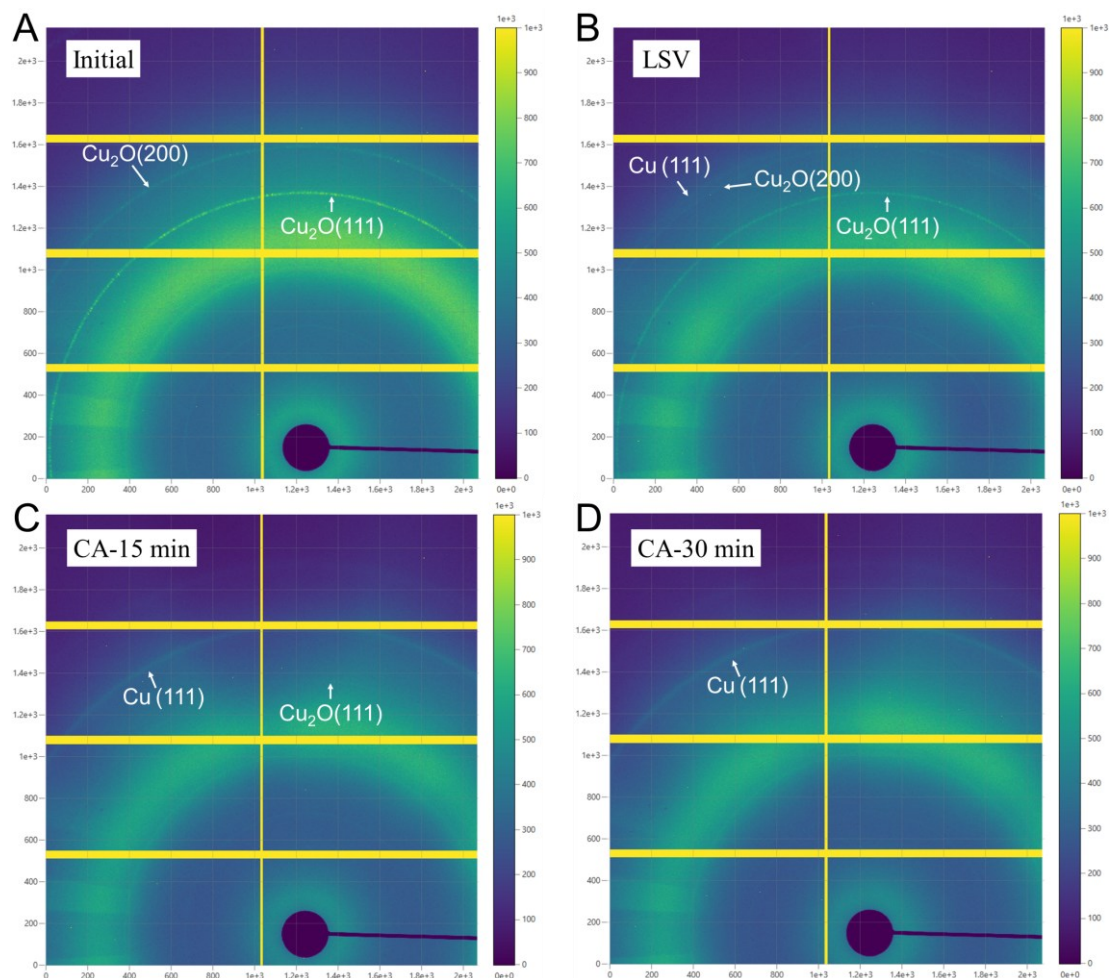

1

2 Figure S42. 2D WAXS patterns of c-Cu<sub>2</sub>O at different treatment times. (A) Initial. (B)  
 3 After LSV activations. (C) After CA treatment for 15 min. (D) After CA treatment for  
 4 30 min. All scattering rings in the WAXS pattern can be indexed to their characteristic  
 5 crystalline phases. According to the curves of scattering intensity as a function of the  
 6 diffraction angle ( $2\theta$ ), the diffraction rings are assigned to Cu<sub>2</sub>O(111), Cu<sub>2</sub>O(200), and  
 7 Cu(111), respectively.

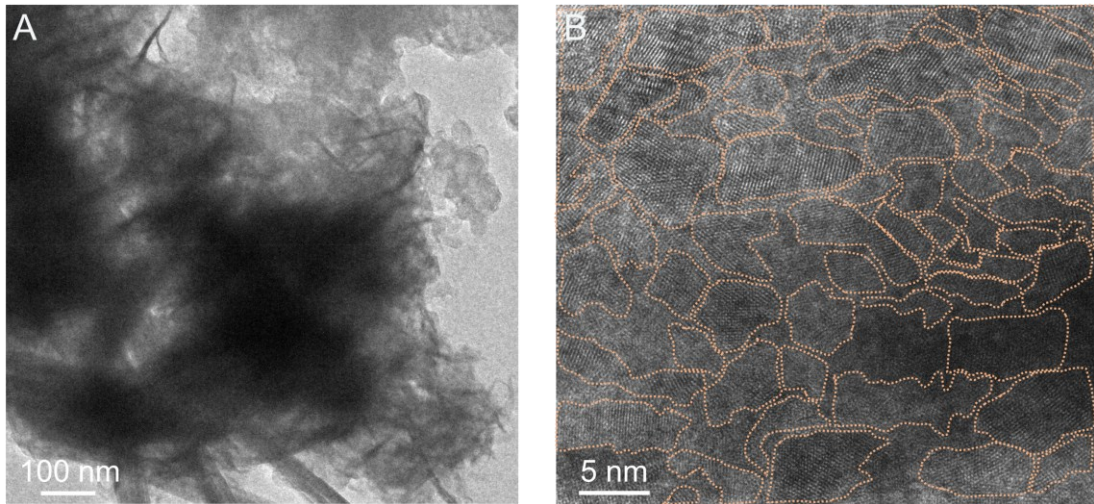

1

2 Figure S43. (A) TEM image and (B) HRTEM image of oc-Cu<sub>2</sub>O after LSV and CA-15

3 min treatments.

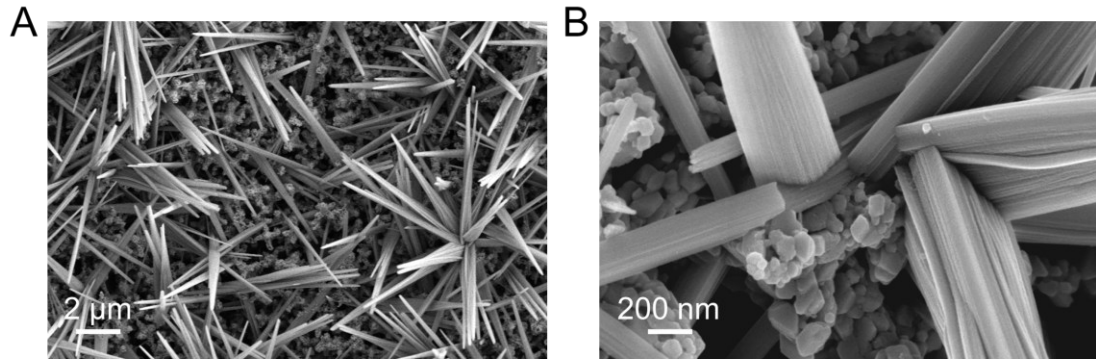

1  
2 Figure S44. (A) Low-magnification and (B) high-magnification SEM images of the oc-  
3 Cu<sub>2</sub>O material after LSV and CA treatments in an Ar atmosphere.

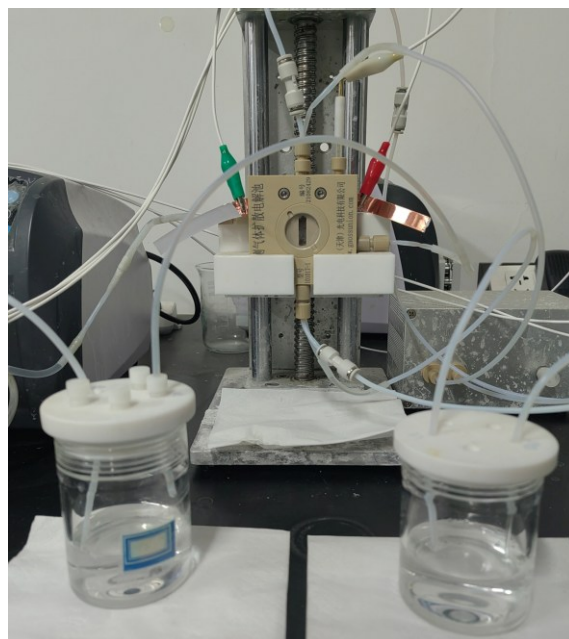

1

2 Figure S45. Photograph of flow cell for CO<sub>2</sub>RR.

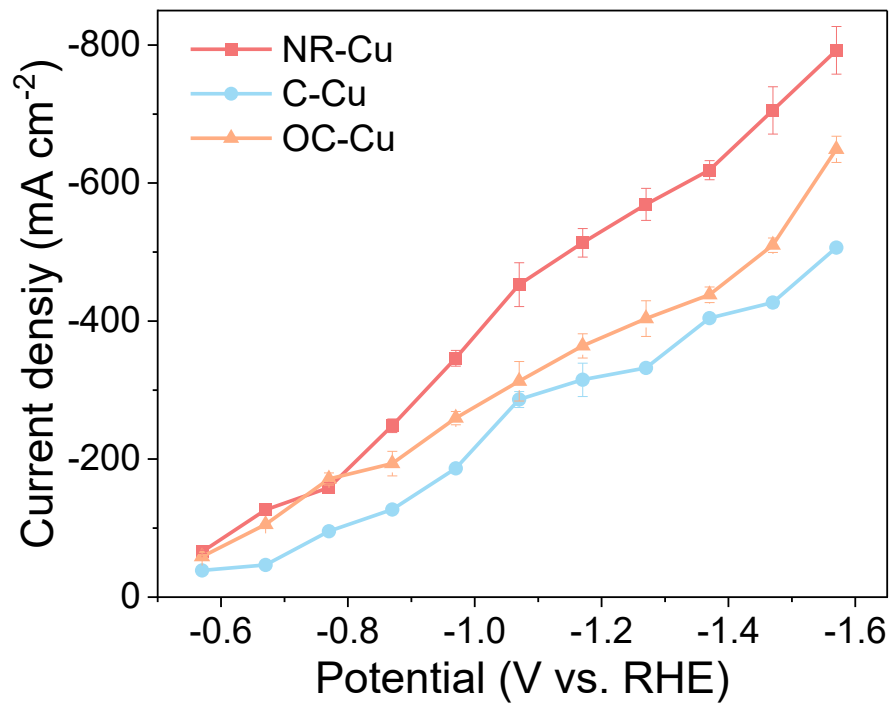

1

2 Figure S46. The total current density of NR-Cu, C-Cu and OC-Cu catalysts at  
3 different potentials.

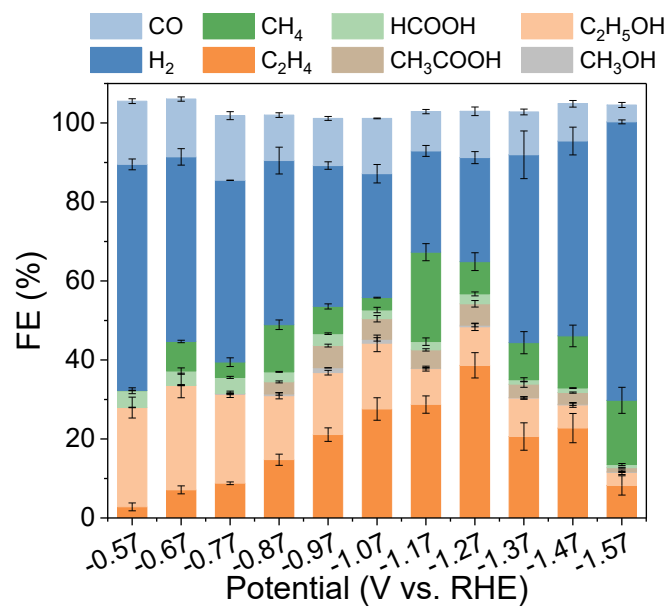

1

2 Figure S47. FEs of CO<sub>2</sub>RR products at different potentials for C-Cu catalyst.

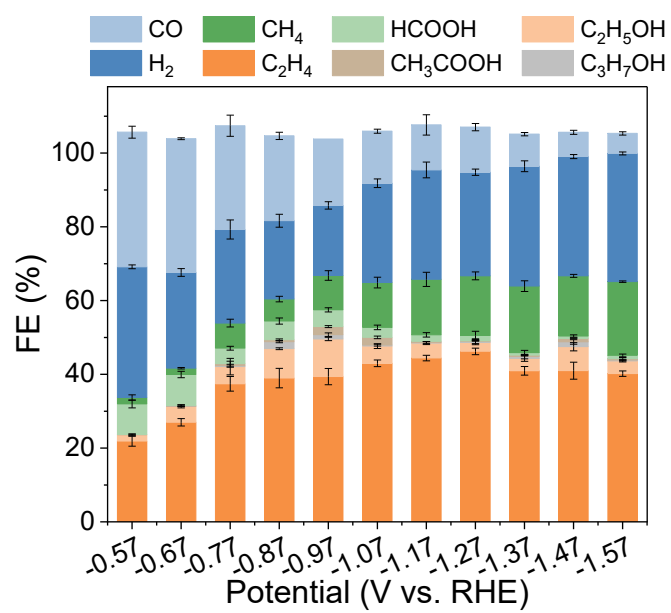

1

2 Figure S48. FEs of CO<sub>2</sub>RR products at different potentials for OC-Cu catalyst.

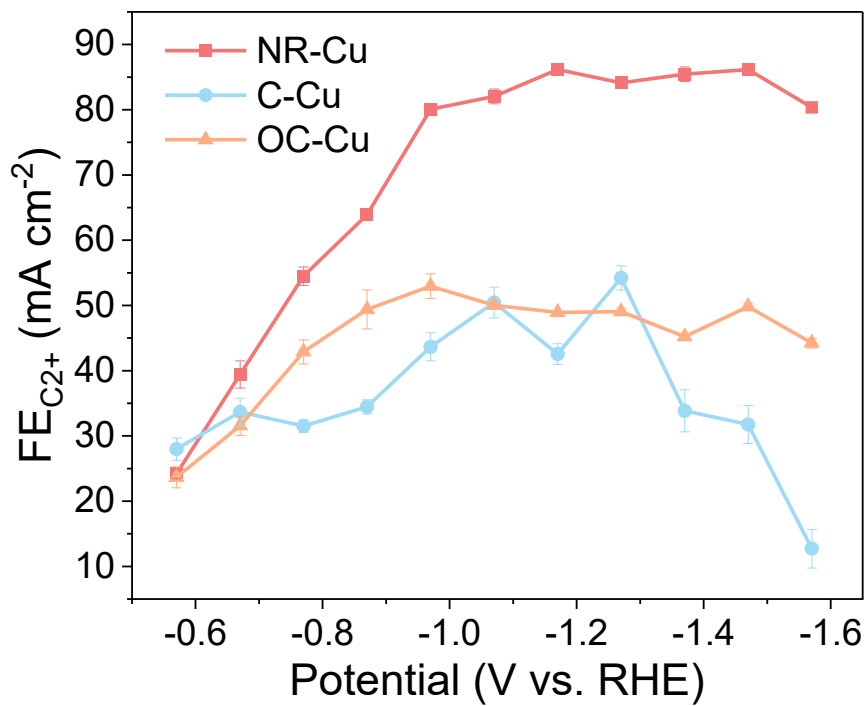

1

2 Figure S49.  $FE_{C_2^+}$  of NR-Cu, C-Cu and OC-Cu catalysts at different potentials.

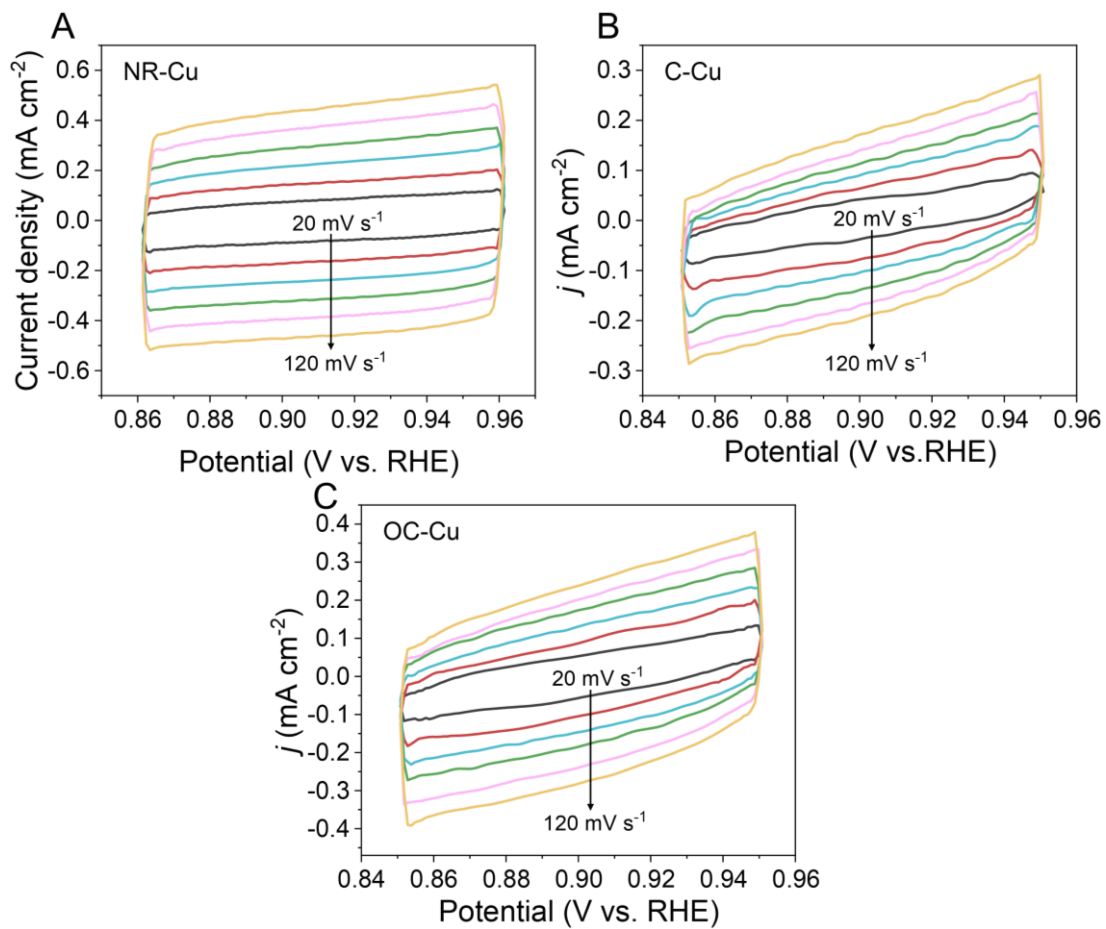

1

- 2 Figure S50. Electrochemical double-layer capacitance measurements. CV curves of (A)  
 3 NR-Cu, (B) C-Cu and (C) OC-Cu at various scan rates.

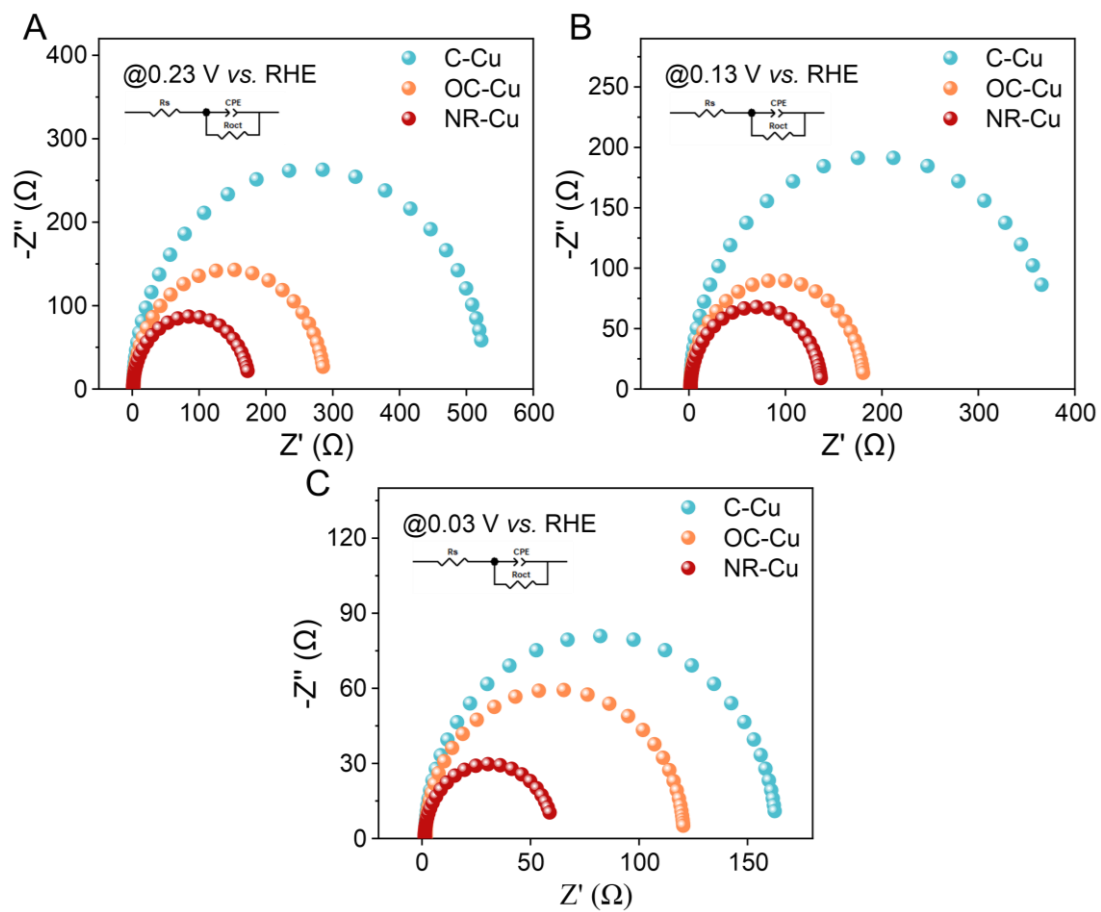

1

2 Figure S51. EIS Nyquist plots and equivalent circuits (inset) for NR-Cu, C-Cu and OC-

3 Cu catalysts at different applied potentials.

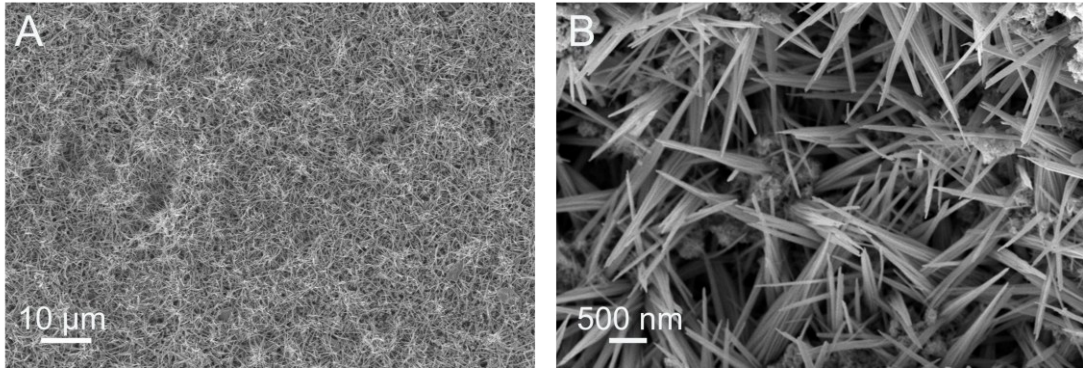

1

2 Figure S52. (A) Low-magnification and (B) high-magnification SEM images of NR-  
3 Cu catalyst after CO<sub>2</sub>RR stability test.

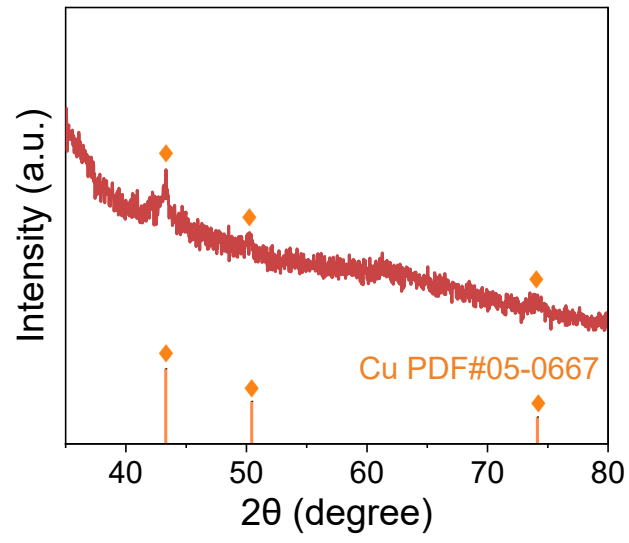

1

2 Figure S53. XRD pattern of NR-Cu catalyst after CO<sub>2</sub>RR stability test.

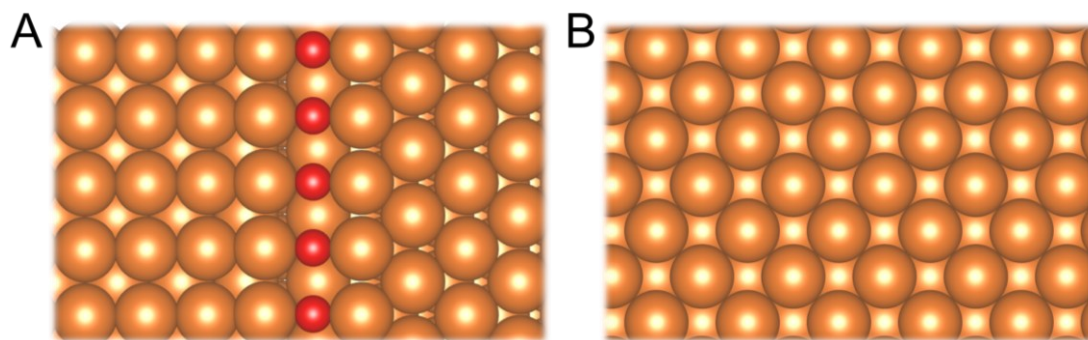

1

2 Figure S54. Optimized structures of (A) NR-Cu and (B) C-Cu. Orange and red spheres  
3 represent Cu and O atoms, respectively.

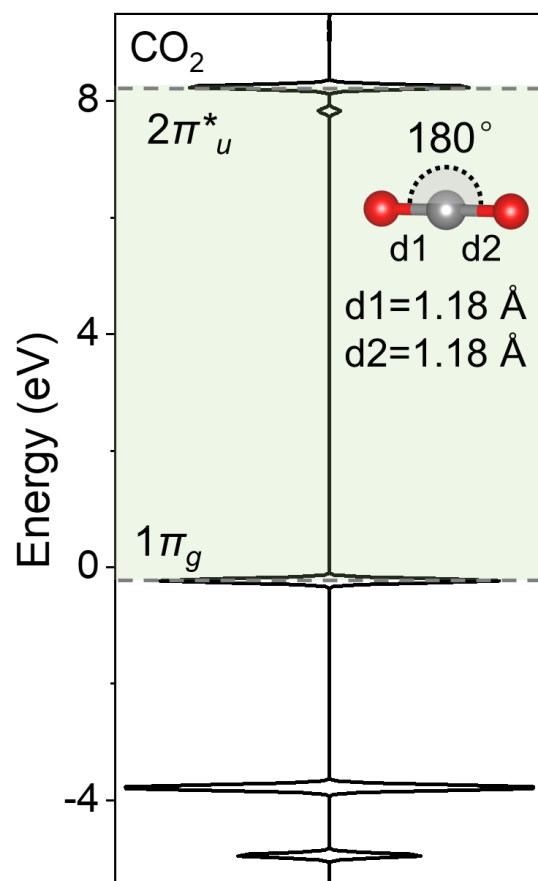

Density of states (a.u)

1

2 Figure S55. The DOS plots for isolated CO<sub>2</sub> molecule. The dashed lines represent the  
 3 highest occupied molecular orbital (HOMO) and the lowest unoccupied molecular  
 4 orbital (LUMO). Gray and red spheres represent C and O atoms, respectively.

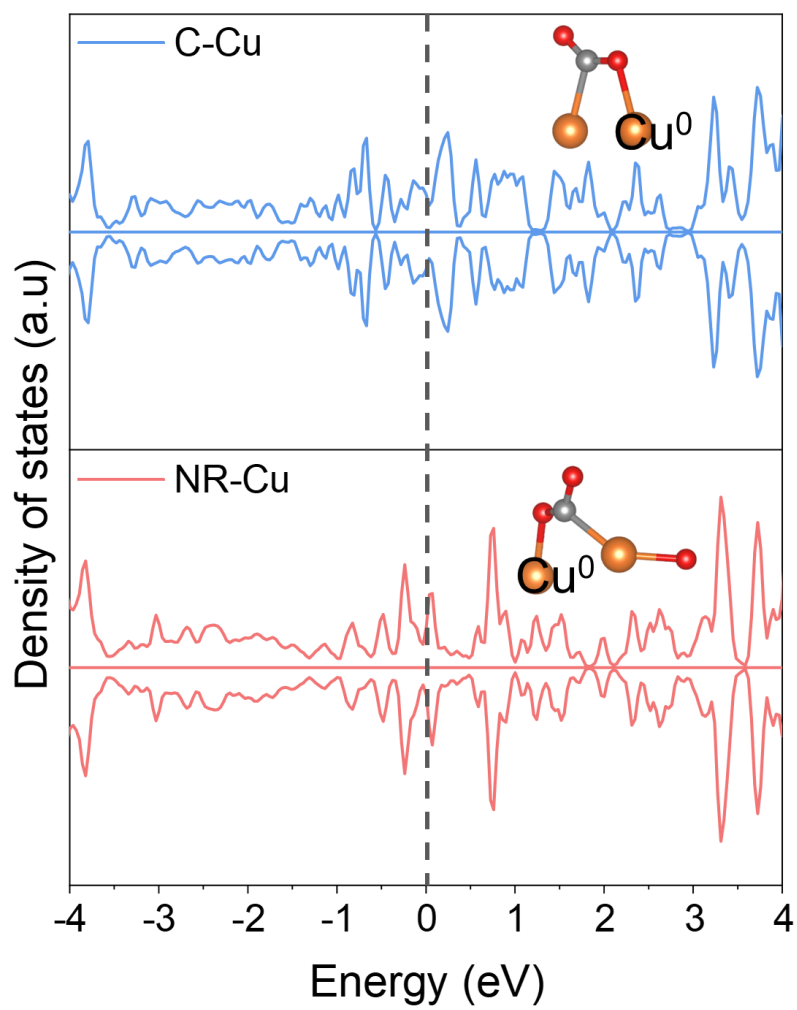

1

2 Figure S56. The Cu 1s DOS of C-Cu and NR-Cu with adsorbed CO<sub>2</sub>. The Orange, red  
3 and gray spheres represent Cu, O and C atoms, respectively.

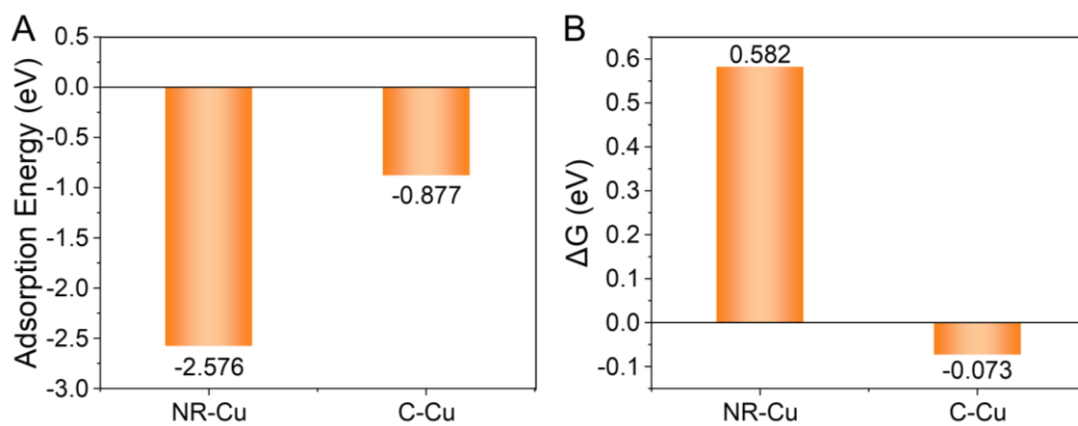

1

2 Figure S57. (A) CO adsorption energies on NR-Cu and C-Cu calculated by DFT. (B)

3  $\Delta G$  values for the  $*CO$ -to- $CO$  pathway on NR-Cu and C-Cu.

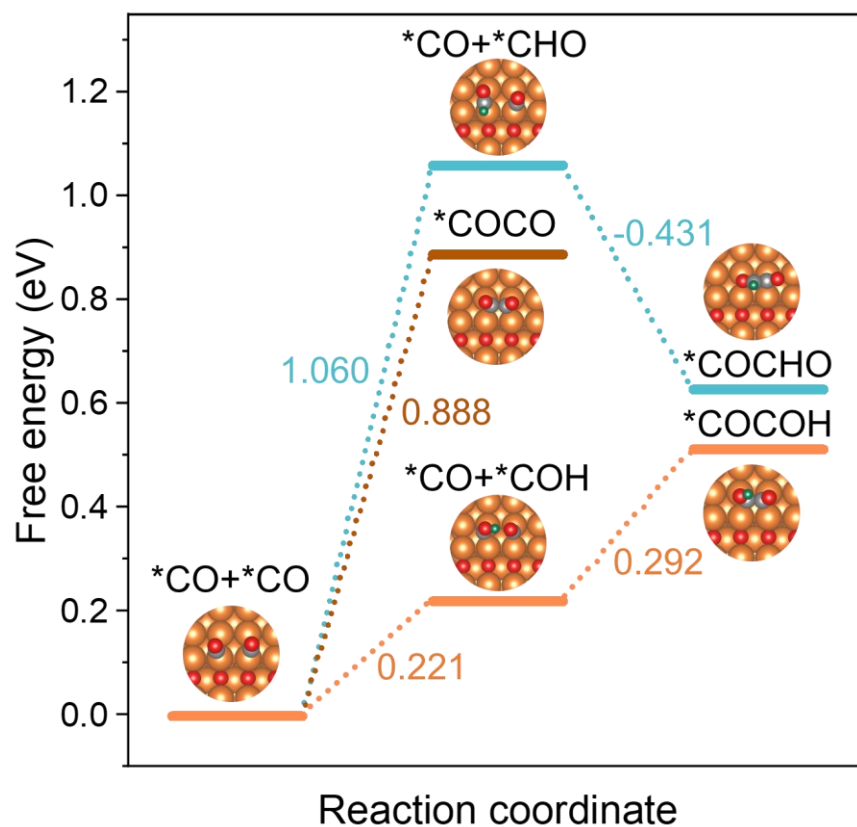

1

2 Figure S58.  $\Delta G$  diagrams for the formation of \*COCO, \*COCHO and \*COCO on  
 3 NR-Cu. The Orange, red, green and gray spheres represent Cu, O, H and C atoms,  
 4 respectively.

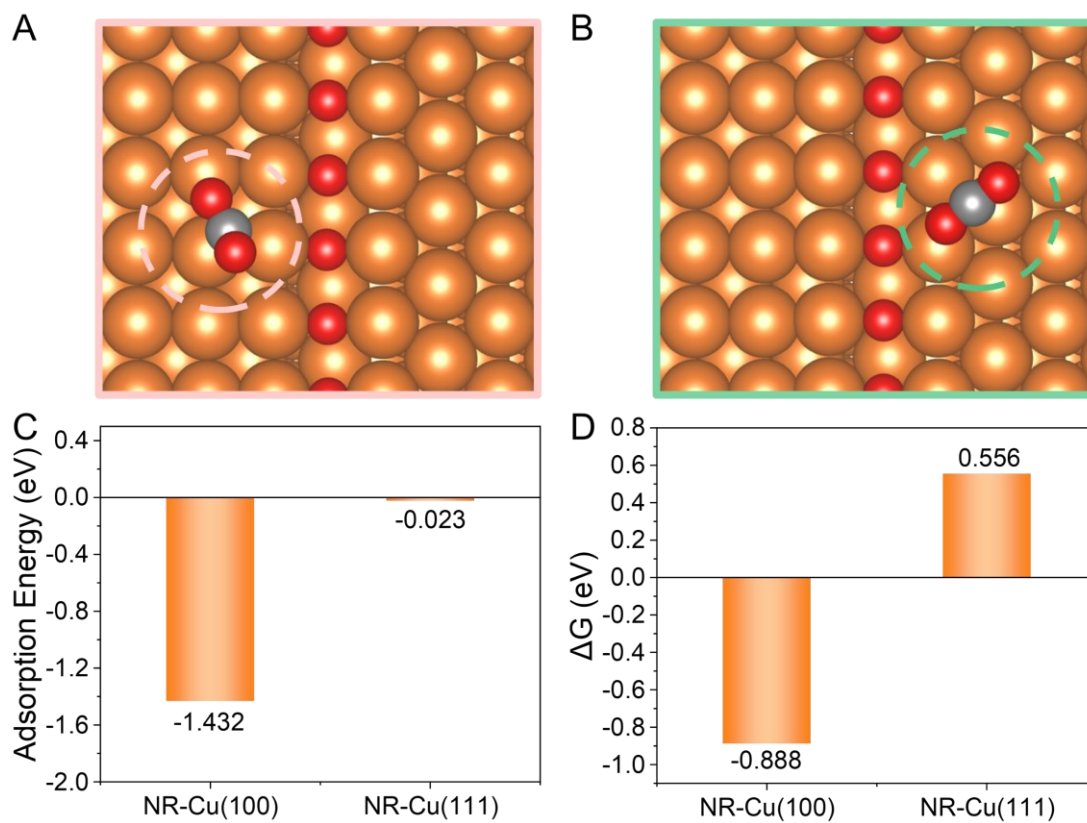

1

2 Figure S59. CO<sub>2</sub> adsorption configurations on distinct facets at a NR-Cu grain boundary.

3 (A) NR-Cu(100) and (B) NR-Cu(111). (C) CO<sub>2</sub> adsorption energies for NR-Cu(100)

4 and NR-Cu(111). (D) ΔG values for the CO<sub>2</sub>-to-\*CO<sub>2</sub> pathway on NR-Cu(100) and

5 NR-Cu(111). The Orange, red and gray spheres represent Cu, O and C atoms,

6 respectively.

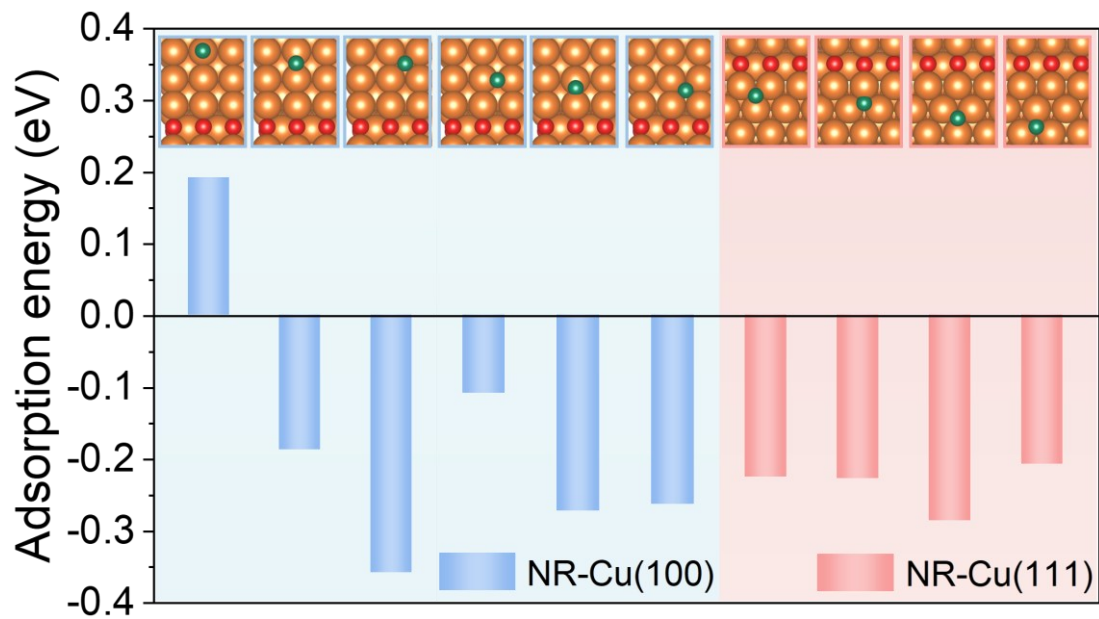

1

2 Figure S60. Structural models of hydrogen adsorption on the Cu sites of NR-Cu and  
 3 hydrogen adsorption energies calculated by DFT. The Orange, red and green spheres  
 4 represent Cu, O and H atoms, respectively.

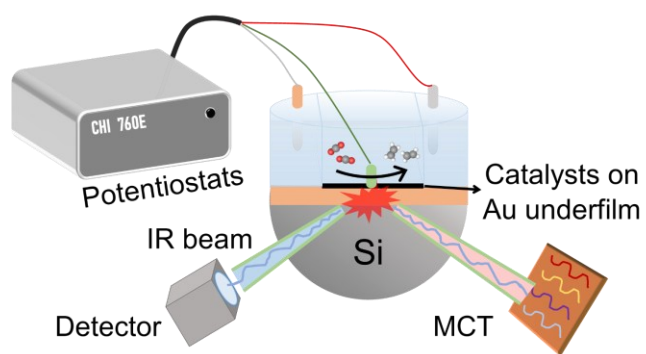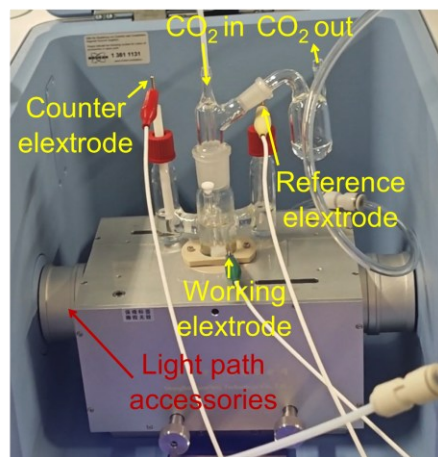

1

2 Figure S61. Schematic diagram (left) and photograph (right) of the *in-situ*  
3 electrochemical ATR-SEIRAS measurement.

## 4 Supplementary Tables

5 Table S1. EXAFS fitting parameters extracted from the Cu K-edge ( $S_0^2 = 0.860$ ).

| Sample  | Path  | CN      | R(Å)      | $\sigma^2(10^{-3}\times\text{Å}^2)$ | $\Delta E_0(\text{eV})$ | R factor |
|---------|-------|---------|-----------|-------------------------------------|-------------------------|----------|
| Cu foil | Cu-Cu | 12      | 2.54±0.01 | 8.7±0.4                             | 4.7±0.6                 | 0.0038   |
| NR-Cu   | Cu-Cu | 7.0±0.5 | 2.54±0.01 | 9.0±0.7                             | 4.5±0.7                 | 0.0169   |
| C-Cu    | Cu-Cu | 9.1±0.8 | 2.54±0.01 | 9.0±0.8                             | 4.5±0.9                 | 0.0089   |
| OC-Cu   | Cu-Cu | 8.1±0.3 | 2.54±0.02 | 8.5±0.6                             | 4.3±0.8                 | 0.0089   |

6 EXAFS fitting results for structural parameters around Cu atoms in Cu foil (R: range from 1 to  
7 3 Å), NR-Cu (R: range from 1.8 to 3 Å), C-Cu (R: range from 1 to 3 Å) and OC-Cu (R: range  
8 from 1 to 3 Å). CN stands for coordination number; R stands for bond distance;  $\sigma^2$  stands for  
9 Debye-Waller factor;  $\Delta E_0$  stands for edge-energy shift; R factor stands for goodness of fit;  $S_0^2$   
10 is fixed as 0.860 during EXAFS fitting based on the Cu foil reference. Error bounds that  
11 characterize the structural parameters obtained by EXAFS spectroscopy were estimated as  
12  $N\pm 20\%$ .

13

Table S2. List of assignment of *in-situ* Raman peaks.

| Raman shift (cm <sup>-1</sup> ) | Assignment                                 | Ref.     |
|---------------------------------|--------------------------------------------|----------|
| ~360                            | $\nu(\text{Cu-CO})$                        | 13       |
| ~528, ~617                      | $\text{Cu}_2\text{O}$                      | 14       |
| ~525                            | $\nu(\text{CuO}_x/\text{Cu}(\text{OH})_y)$ | 15       |
| ~706                            | $\nu(\text{Cu-OH})$                        | 15,16    |
| ~1071                           | $\nu(*\text{CO}_3^{2-})$                   | 17,18    |
| 1240-1290                       | $\delta(\text{C-H})$                       | 19       |
| ~1317                           | $\nu(\text{CO}_2^-)/\delta(\text{CO}_2)$   | 17,20,21 |
| ~1690                           | $\nu(*\text{COOH})$                        | 13       |
| ~1850                           | $\nu(\text{Cu-CO}_{\text{bridge}})$        | 14,15    |
| 2030-2090                       | $\nu(\text{Cu-CO}_{\text{top}})$           | 15,18,20 |

14  $\nu$ : stretching vibration;  $\delta$ : deformational vibration.

Table S3. The detailed comparison of various reported Cu-based electrocatalysts.

| Catalysts                                              | Electrolyzer | Electrolyte              | $j_{\text{total}}$<br>(mA cm <sup>-2</sup> ) | FE <sub>C<sub>2</sub>H<sub>4</sub></sub><br>(%) | $j_{\text{C2H4(mA cm-2)$ | Ref. |
|--------------------------------------------------------|--------------|--------------------------|----------------------------------------------|-------------------------------------------------|--------------------------|------|
| Cu <sub>2</sub> O derived Cu                           | H-cell       | 0.1 M KHCO <sub>3</sub>  | 25                                           | 40                                              | 10                       | 22   |
| Plasma-activated Cu                                    | H-cell       | 0.1 M KHCO <sub>3</sub>  | 23                                           | 60                                              | 13.8                     | 23   |
| B-doped Cu                                             | H-cell       | 0.1 M KCl                | 70                                           | 52                                              | 36.4                     | 24   |
| (100) Cu nanocubes                                     | H-cell       | 0.25 M KHCO <sub>3</sub> | 68                                           | 32                                              | 21.8                     | 25   |
| <sup>a</sup> Cu(OH) <sub>2</sub> -D/Cu                 | Flow cell    | 1 M KOH                  | 250                                          | 58                                              | 145                      | 26   |
| <sup>b</sup> NPC <sub>MAF-4</sub> -Cu <sub>2</sub> -21 | Flow cell    | 0.1 M KHCO <sub>3</sub>  | 180                                          | 52                                              | 93.6                     | 27   |
| <sup>c</sup> HKUST-1                                   | Flow cell    | 1 M KOH                  | 262                                          | 45                                              | 180                      | 28   |
| <sup>d</sup> Cu-S                                      | Flow cell    | 1 M KOH                  | 398.6                                        | 57.2                                            | 228                      | 29   |
| <sup>e</sup> Cu <sub>2</sub> O(CO)                     | Flow cell    | 1 M KOH                  | 500                                          | 56.6                                            | 283                      | 8    |
| Cu <sub>2</sub> P <sub>2</sub> O <sub>7</sub>          | Flow cell    | 1 M KOH                  | 350                                          | 41.8                                            | 83.6                     | 30   |
| <sup>f</sup> CuO-C(O)                                  | Flow cell    | 1 M KOH                  | 500                                          | 60                                              | 300                      | 31   |
| <sup>g</sup> EP-CoP/Cu                                 | Flow cell    | 1 M KOH                  | 726                                          | 43                                              | 312.2                    | 32   |
| B-Cu                                                   | Flow cell    | 1 M KOH                  | 200                                          | 49                                              | 98                       | 33   |
| F-Cu                                                   | Flow cell    | 1M KOH                   | 250                                          | 59.9                                            | 150                      | 34   |
| Cu <sub>cub</sub>                                      | Flow cell    | 1 M KOH                  | 300                                          | 57                                              | 171                      | 35   |
| <sup>h</sup> Cu-C <sub>6</sub> %                       | Flow cell    | 1 M KOH                  | 800                                          | 47                                              | 376                      | 36   |
| CuTA                                                   | Flow cell    | 1 M KOH                  | 700                                          | 60.8                                            | 425.6                    | 37   |
| Cu nanoparticle                                        | Flow cell    | 1 M KOH                  | 430                                          | 35                                              | 150.5                    | 38   |
| Dendritic Cu                                           | Flow cell    | 0.1 M KHCO <sub>3</sub>  | 450                                          | 36                                              | 162                      | 39   |
| 25 nm Cu film                                          | Flow cell    | 10 M KOH                 | 275                                          | 66                                              | 181.5                    | 40   |
| CuAg-wire                                              | Flow cell    | 1 M KOH                  | 300                                          | 60                                              | 180                      | 41   |
| Porous Cu                                              | Flow cell    | 1 M KOH                  | 653                                          | 38.6                                            | 252                      | 42   |

|                      |           |         |     |      |       |           |
|----------------------|-----------|---------|-----|------|-------|-----------|
| <sup>i</sup> Cu-P1   | Flow cell | 1 M KOH | 450 | 72   | 324   | 43        |
| <sup>j</sup> Cu-CoPc | Flow cell | 1 M KOH | 420 | 67   | 281.5 | 44        |
| NR-Cu                | Flow cell | 1 M KOH | 514 | 74.7 | 384   | This work |

16 <sup>a</sup>Cu(OH)<sub>2</sub>-D/Cu: Cu(OH)<sub>2</sub> supported on Cu foil was placed in a CO<sub>2</sub>-saturated 0.1 M KHCO<sub>3</sub>  
17 aqueous solution and reduced under the bias potential of -0.5 V vs. RHE for ≈ 800 s

18 <sup>b</sup>NPC<sub>MAF-4</sub>-Cu<sub>2</sub>-21: Nitrogen-doped porous carbons comprising dual Cu sites at a loading of  
19 21.2 wt%

20 <sup>c</sup>HKUST-1: a Cu dimer catalyst with paddle-wheel structure in HKUST-1 MOF

21 <sup>d</sup>Cu-S: the stable Cu@Smotifis dispersed in the framework of HKUST-1

22 <sup>e</sup>Cu<sub>2</sub>O(CO): a Cu<sub>2</sub>O-Cu nanocube hybrid catalyst obtained by the thermal reduction of Cu<sub>2</sub>O  
23 nanocubes under a CO atmosphere

24 <sup>f</sup>CuO-C(O): a CuO nanosheet/graphene oxide dots hybrid

25 <sup>g</sup>EP-CoP/Cu: a nano-thickness cobalt porphyrin polymeric network (EP-CoP) onto a Cu  
26 electrode

27 <sup>h</sup>Cu-C<sub>6%</sub>: a carbon-modified Cu catalyst with a carbon atomic percentage of 6%

28 <sup>i</sup>Cu-P1: a Cu-polyamine hybrid catalyst

29 <sup>j</sup>Cu-CoPc: a tandem catalyst with cobalt phthalocyanine

30

Table S4. List of peak assignments for *in-situ* ATR-SEIRAS spectra.

| Band center (cm <sup>-1</sup> ) | Assignment                      | Ref.  |
|---------------------------------|---------------------------------|-------|
| ~1362, ~1125                    | *OC <sub>2</sub> H <sub>5</sub> | 45-47 |
| 1400-1430                       | *COOH                           | 45,46 |
| 1465-1540, ~1717                | *COH                            | 46    |
| ~1211, ~1584                    | *OCCOH                          | 45-47 |
| 2070-2080                       | *CO                             | 46    |
| ~2854, ~2927                    | C-H                             | 48    |

31

## 32 Supplementary References

- 33 [1] Shang, Y. & Guo, L. Facet-controlled synthetic strategy of Cu<sub>2</sub>O-based crystals for catalysis and sensing.  
34 *Adv. Sci.* **2**, 1500140 (2015).
- 35 [2] Shang, Y., et al. A facile top-down etching to create a Cu<sub>2</sub>O jagged polyhedron covered with numerous {110}  
36 edges and {111} corners with enhanced photocatalytic activity. *Chem. Eur. J.* **18**, 14261-14266 (2012).
- 37 [3] Yan, et al. Ubiquitous strategy for probing ATR surface-enhanced infrared absorption at platinum group  
38 metal-electrolyte interfaces. *J. Phys. Chem. B* **109**, 7900-7906 (2005).
- 39 [4] Kresse, G. & Furthmüller, J. Efficiency of ab-initio total energy calculations for metals and semiconductors  
40 using a plane-wave basis set. *Compu. Mater. Sci.* **6**, 15-50 (1996).
- 41 [5] Blöchl, P. E. Projector augmented-wave method. *Phys. Rev. B* **50**, 17953-17979 (1994).
- 42 [6] Perdew, J. P., et al. Atoms, molecules, solids, and surfaces: Applications of the generalized gradient  
43 approximation for exchange and correlation. *Phys. Rev. B* **46**, 6671-6687 (1992).
- 44 [7] Nørskov, J. K., et al. Origin of the overpotential for oxygen reduction at a fuel-cell cathode. *J. Phys. Chem.*  
45 *B* **108**, 17886-17892 (2004).
- 46 [8] Wu, Q., et al. Nanograin-boundary-abundant Cu<sub>2</sub>O-Cu nanocubes with high C<sub>2+</sub> selectivity and good  
47 stability during electrochemical CO<sub>2</sub> reduction at a current density of 500 mA cm<sup>-2</sup>. *ACS Nano* **17**, 12884-  
48 12894 (2023).
- 49 [9] Wang, Y., et al. Synthesis of porous Cu<sub>2</sub>O/CuO cages using Cu-based metal-organic frameworks as templates  
50 and their gas-sensing properties. *J. Mater. Chem. A* **3**, 12796-12803 (2015).
- 51 [10] Wang, L., et al. Stabilized Cu<sup>δ+</sup>-OH species on in situ reconstructed Cu nanoparticles for CO<sub>2</sub>-to-C<sub>2</sub>H<sub>4</sub>  
52 conversion in neutral media. *Nat. Commun.* **15**, 7477 (2024).
- 53 [11] Artiglia, L., et al. In situ X-ray photoelectron spectroscopy detects multiple active sites involved in the  
54 selective anaerobic oxidation of methane in copper-exchanged zeolites. *ACS Catal.* **9**, 6728-6737 (2019).
- 55 [12] Dan, Z., Yang, Y., Qin, F., Wang, H. & Chang, H. Facile fabrication of Cu<sub>2</sub>O nanobelts in ethanol on  
56 nanoporous Cu and their photodegradation of methyl orange. *Materials* **11**, 446 (2018).
- 57 [13] Zhang, W., et al. Crystallinity-directed in situ reconstruction of Cu-Al oxides yielding tunable Cu<sup>δ+</sup> sites  
58 for electrochemical CO<sub>2</sub>-to-C<sub>2+</sub> conversion. *ACS Nano* **19**, 24023-24033 (2025).
- 59 [14] Chang, X., Zhao, Y. & Xu, B. pH dependence of Cu surface speciation in the electrochemical CO reduction  
60 reaction. *ACS Catal.* **10**, 13737-13747 (2020).
- 61 [15] Zhao, Y., et al. Speciation of Cu surfaces during the electrochemical CO reduction reaction. *J. Am. Chem.*  
62 *Soc.* **142**, 9735-9743 (2020).
- 63 [16] Bodappa, N., et al. Early stages of electrochemical oxidation of Cu(111) and polycrystalline Cu surfaces  
64 revealed by in Situ Raman spectroscopy. *J. Am. Chem. Soc.* **141**, 12192-12196 (2019).
- 65 [17] Chernyshova, I. V., Somasundaran, P. & Ponnurangam, S. On the origin of the elusive first intermediate of  
66 CO<sub>2</sub> electroreduction. *Proc. Natl. Acad. Sci.* **115**, E9261-E9270 (2018).
- 67 [18] Ma, L., et al. Cu supraparticles with enhanced mass transfer and abundant C-C coupling sites achieving  
68 ampere-level CO<sub>2</sub>-to-C<sub>2+</sub> electrosynthesis. *Nat. Commun.* **16**, 3421 (2025).
- 69 [19] Fant, K. & Boggs, J. E. Theoretical prediction of vibrational spectra: the harmonic force field and the  
70 vibrational spectrum of 4-methylpyridine. *Tetrahedron* **42**, 1265-1274 (1986).
- 71 [20] Niu, Z.-Z., et al. Hierarchical copper with inherent hydrophobicity mitigates electrode flooding for high-  
72 rate CO<sub>2</sub> electroreduction to multicarbon products. *J. Am. Chem. Soc.* **143**, 8011-8021 (2021).
- 73 [21] Santos Jr, V. O., Leite, I. R., Brolo, A. G. & Rubim, J. C. The electrochemical reduction of CO<sub>2</sub> on a copper  
74 electrode in 1-n-butyl-3-methyl imidazolium tetrafluoroborate (BMI.BF<sub>4</sub>) monitored by surface-enhanced  
75 Raman scattering (SERS). *J. Raman Spectrosc.* **47**, 674-680 (2016).
- 76 [22] Ren, D., et al. Selective electrochemical reduction of carbon dioxide to ethylene and ethanol on copper(I)  
77 oxide catalysts. *ACS Catal.* **5**, 2814-2821 (2015).
- 78 [23] Mistry, H., et al. Highly selective plasma-activated copper catalysts for carbon dioxide reduction to ethylene.  
79 *Nat. Commun.* **7**, 12123 (2016).
- 80 [24] Zhou, Y., et al. Dopant-induced electron localization drives CO<sub>2</sub> reduction to C<sub>2</sub> hydrocarbons. *Nat. Chem.*  
81 **10**, 974-980 (2018).
- 82 [25] Jiang, K., et al. Metal ion cycling of Cu foil for selective C-C coupling in electrochemical CO<sub>2</sub> reduction.  
83 *Nat. Catal.* **1**, 111-119 (2018).
- 84 [26] Zhong, D., et al. Coupling of Cu(100) and (110) facets promotes carbon dioxide conversion to hydrocarbons  
85 and alcohols. *Angew. Chem. Int. Ed.* **60**, 4879-4885 (2021).
- 86 [27] Heng, J.-M., Zhu, H.-L., Zhao, Z.-H., Liao, P.-Q. & Chen, X.-M. Fabrication of ultrahigh-loading dual  
87 copper sites in nitrogen-doped porous carbons boosting electroreduction of CO<sub>2</sub> to C<sub>2</sub>H<sub>4</sub> under neutral  
88 conditions. *Adv. Mater.* **37**, 2415101 (2025).
- 89 [28] Nam, D.-H., et al. Metal-organic frameworks mediate Cu coordination for selective CO<sub>2</sub> electroreduction. *J.*  
90 *Am. Chem. Soc.* **140**, 11378-11386 (2018).

- 91 [29] Wen, C. F., et al. Highly ethylene-selective electrocatalytic CO<sub>2</sub> reduction enabled by isolated Cu-S motifs  
92 in metal-organic framework based precatalysts. *Angew. Chem. Int. Ed.* **61**, e202111700 (2022).
- 93 [30] Sang, J., et al. A reconstructed Cu<sub>2</sub>P<sub>2</sub>O<sub>7</sub> catalyst for selective CO<sub>2</sub> electroreduction to multicarbon products.  
94 *Angew. Chem. Int. Ed.* **61**, e202114238 (2022).
- 95 [31] Du, R., et al. Cu-C(O) interfaces deliver remarkable selectivity and stability for CO<sub>2</sub> reduction to C<sub>2+</sub>  
96 products at industrial current density of 500 mA cm<sup>-2</sup>. *Small* **19**, 2301289 (2023).
- 97 [32] Wang, C., et al. In Situ electropolymerizing toward EP-CoP/Cu tandem catalyst for enhanced  
98 electrochemical CO<sub>2</sub>-to-ethylene conversion. *Adv. Sci.* **11**, 2404053 (2024).
- 99 [33] Song, Y., et al. B-Cu-Zn gas diffusion electrodes for CO<sub>2</sub> electroreduction to C<sub>2+</sub> products at high current  
100 densities. *Angew. Chem. Int. Ed.* **60**, 9135-9141 (2021).
- 101 [34] Zhou, Z., Hu, X., Li, J., Xie, H. & Wen, L. Enhanced CO<sub>2</sub> electroreduction to multi-carbon products on  
102 copper via plasma fluorination. *Adv. Sci.* **11**, 2309963 (2024).
- 103 [35] De Gregorio, G. L., et al. Facet-dependent selectivity of Cu catalysts in electrochemical CO<sub>2</sub> reduction at  
104 commercially viable current densities. *ACS Catal.* **10**, 4854-4862 (2020).
- 105 [36] Dong, X., et al. Electrochemical CO<sub>2</sub> reduction to C<sub>2+</sub> products with ampere-level current on carbon-  
106 modified copper catalysts. *Acta Phys. -Chim. Sin.* **41**, 100024 (2025).
- 107 [37] Wu, M., et al. Sequential \*CO management via controlling in situ reconstruction for efficient industrial-  
108 current-density CO<sub>2</sub>-to-C<sub>2+</sub> electroreduction. *Proc. Natl. Acad. Sci.* **120**, e2302851120 (2023).
- 109 [38] Ma, S., et al. One-step electrosynthesis of ethylene and ethanol from CO<sub>2</sub> in an alkaline electrolyzer. *J.*  
110 *Power Sources* **301**, 219-228 (2016).
- 111 [39] De Luna, P., et al. Catalyst electro-redeposition controls morphology and oxidation state for selective carbon  
112 dioxide reduction. *Nat. Catal.* **1**, 103-110 (2018).
- 113 [40] Dinh, C.-T., et al. CO<sub>2</sub> electroreduction to ethylene via hydroxide-mediated copper catalysis at an abrupt  
114 interface. *Science* **360**, 783-787 (2018).
- 115 [41] Hoang, T. T. H., et al. Nanoporous copper-silver alloys by additive-controlled electrodeposition for the  
116 selective electroreduction of CO<sub>2</sub> to ethylene and ethanol. *J. Am. Chem. Soc.* **140**, 5791-5797 (2018).
- 117 [42] Lv, J.-J., et al. A highly porous copper electrocatalyst for carbon dioxide reduction. *Adv. Mater.* **30**, 1803111  
118 (2018).
- 119 [43] Chen, X., et al. Electrochemical CO<sub>2</sub>-to-ethylene conversion on polyamine-incorporated Cu electrodes. *Nat.*  
120 *Catal.* **4**, 20-27 (2021).
- 121 [44] Kong, X., et al. Understanding the effect of \*CO coverage on C-C coupling toward CO<sub>2</sub> electroreduction.  
122 *Nano Lett.* **22**, 3801-3808 (2022).
- 123 [45] Zheng, M., et al. Electrocatalytic CO<sub>2</sub>-to-C<sub>2+</sub> with ampere-level current on heteroatom-engineered copper  
124 via tuning \*CO intermediate coverage. *J. Am. Chem. Soc.* **144**, 14936-14944 (2022).
- 125 [46] Zhang, T., Yuan, B., Wang, W., He, J. & Xiang, X. Tailoring \*H intermediate coverage on the CuAl<sub>2</sub>O<sub>4</sub>/CuO  
126 catalyst for enhanced electrocatalytic CO<sub>2</sub> reduction to ethanol. *Angew. Chem. Int. Ed.* **62**, e202302096  
127 (2023).
- 128 [47] Yin, Y., et al. Enhancing CO<sub>2</sub> electroreduction to ethylene in acidic solution by optimizing cation  
129 configuration on the Cu surface. *J. Am. Chem. Soc.* **147**, 25584-25591 (2025).
- 130 [48] Wei, D., et al. Surface adsorbed hydroxyl: A double-edged sword in electrochemical CO<sub>2</sub> reduction over  
131 oxide-derived copper. *Angew. Chem. Int. Ed.* **62**, e202306876 (2023).
